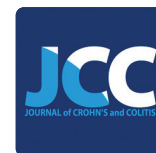

Review Article

# Predictors of Primary Response to Biologic Treatment [Anti-TNF, Vedolizumab, and Ustekinumab] in Patients With Inflammatory Bowel Disease: From Basic Science to Clinical Practice

Javier P. Gisbert and María Chaparro

Gastroenterology Unit, Hospital Universitario de La Princesa, Instituto de Investigación Sanitaria Princesa [IIS-IP], Universidad Autónoma de Madrid, Centro de Investigación Biomédica en Red de Enfermedades Hepáticas y Digestivas [CIBEREHD], Madrid, Spain

Corresponding author: Javier P. Gisbert, MD, Gastroenterology Unit, Hospital Universitario de La Princesa, Diego de León, 62. 28006 Madrid, Spain. Tel.: 34-913093911; fax: 34-915204013, email: [javier.p.gisbert@gmail.com](mailto:javier.p.gisbert@gmail.com)

## Abstract

**Background:** Inflammatory bowel diseases [IBD]—ulcerative colitis and Crohn's disease—are commonly treated with biologic drugs. However, only approximately two-thirds of patients have an initial response to these therapies. Personalised medicine has the potential to optimise efficacy, decrease the risk of adverse drug events, and reduce costs by establishing the most suitable therapy for a selected patient.

**Aim:** The present study reviews the potential predictors of short-term primary response to biologic treatment, including not only anti-tumour necrosis factor [TNF] agents [such as infliximab, adalimumab, certolizumab, and golimumab] but also vedolizumab and ustekinumab.

**Methods:** We performed a systematic bibliographical search to identify studies investigating predictive factors of response to biologic therapy.

**Results:** For anti-TNF agents, most of the evaluated factors have not demonstrated usefulness, and many others are still controversial. Thus, only a few factors may have a potential role in the prediction of the response, including disease behaviour/phenotype, disease severity, C-reactive protein, albumin, cytokine expression in serum, previous anti-TNF therapy, some proteomic markers, and some colorectal mucosa markers. For vedolizumab, the availability of useful predictive markers seems to be even lower, with only some factors showing a limited value, such as the expression of  $\alpha 4\beta 7$  integrin in blood, the faecal microbiota, some proteomic markers, and some colorectal mucosa markers. Finally, in the case of ustekinumab, no predictive factor has been reported yet to be helpful in clinical practice.

**Conclusion:** In summary, currently no single marker fulfils all criteria for being an appropriate prognostic indicator of response to any biologic treatment in IBD.

**Key Words:** Adalimumab; anti-TNF; biologics; Crohn's disease; certolizumab; golimumab; inflammatory bowel disease; infliximab; predictive; response; ulcerative colitis; ustekinumab; vedolizumab

## 1. Introduction

Inflammatory bowel diseases [IBD]—ulcerative colitis [UC] and Crohn's disease [CD]—are chronic idiopathic inflammatory diseases affecting the gastrointestinal tract. The use of anti-tumour necrosis factor [anti-TNF] agents has revolutionised the treatment of IBD. Their use avoids the need for steroid therapy, promotes mucosal healing, reduces hospitalisations and surgeries, and therefore dramatically improves the quality of life of IBD patients.<sup>1</sup> However, only approximately two-thirds of the IBD patients treated with anti-TNF drugs have an initial response to therapy.<sup>2</sup>

For many years, anti-TNF agents were the only type of biologics used for IBD treatment. However, two new biologic drugs that target different inflammatory pathways have been approved for IBD in recent years: vedolizumab<sup>3</sup> and ustekinumab.<sup>4</sup> However, similar to anti-TNF agents, a significant number of patients do not respond to these drugs and their place relative to anti-TNF therapy [before or after] remains unclear.

Since the aforementioned biologic medications do not work in everyone, are associated with rare but serious side effects, and have a high cost, it would be important to selectively treat patients who have the highest chance of responding. Until now, the strategy for testing these biologics in clinical settings used to be 'one drug suits all', although they may be beneficial in only a subset of patients characterised by a specific target.<sup>5-9</sup> Recent evidence suggests that the mechanisms underlying primary non-response are multifactorial and include disease characteristics, drug, and treatment strategy-related factors. Personalised medicine is a relatively new concept that has the potential to optimise efficacy, decrease the risk of adverse drug events, and reduce costs by establishing the most suitable therapy for a selected patient.<sup>10</sup> In other words, personalised medicine refers, precisely, to a medical model using characterisation of an individual's phenotypes and genotypes for tailoring the right therapeutic strategy for the right person at the right time.<sup>11</sup>

The present review will summarise the current data on predictors of short-term primary response to biologic treatment in IBD patients, including not only anti-TNF agents [such as infliximab, adalimumab, certolizumab, and golimumab] but also more recently approved biologics such as vedolizumab and ustekinumab.

A systematic bibliographical search was designed to identify studies reporting on predictive factors of response to biologic therapy in patients with IBD. An electronic search was performed in PubMed up to January 2019 using the following algorithm: ['inflammatory bowel disease' OR 'ulcerative colitis' OR 'Crohn's disease'] AND [predictor OR predictors OR predictive OR prediction] AND [response OR remission] AND [infliximab OR adalimumab OR certolizumab OR golimumab OR anti-TNF OR anti-TNF OR vedolizumab OR ustekinumab OR biologic]. With this search strategy, 494 citations were identified. In addition, the reference lists from the selected articles were reviewed to identify additional studies of potential interest.

Only studies conducted in humans were included and animal models were excluded. Available data from both clinical trials and 'real life' studies were included. In general, primary non-response to treatment is best assessed after at least three infusions or injections of anti-TNF medication.<sup>12</sup> In clinical practice, primary non-response to anti-TNF agents should not be assessed before Weeks 8–12, as successful induction of remission may still be achieved after three infliximab infusions at Weeks 0, 2, and 6<sup>12</sup>. Therefore, the short-term response [or non-response] in the included studies had to be assessed after an induction period [generally within approximately

12–14 weeks, but up to 16 weeks]. Pharmacokinetic studies [e.g., therapeutic drug monitoring] were excluded. Studies evaluating the response in patients with postoperative recurrence of CD were also excluded. Finally, predictive markers had to be measured at the time the biologic treatment was initiated [i.e., at baseline], and therefore changes between biomarkers before and after therapy were not considered. Articles published in any language were included.

## 2. Predictors of Primary Response to Anti-TNF Treatment

We have schematically divided the predictive factors of efficacy for anti-TNF agents in IBD patients into three groups: i) patient-related factors; ii) disease-related factors; and iii) immune-epithelial biomarkers.

Potential predictors of favourable response to biologic agents [anti-TNF, vedolizumab, and ustekinumab] in CD and UC are included in [Tables 1 and 2](#), respectively, and the most relevant information of each study evaluating predictors of response to these agents [such as drug treatment, IBD type, number of patients, study design, predictors considered and predictors of response] is summarised in [Supplementary Table 1](#), available as [Supplementary data at ECCO-JCC online](#).

### 2.1. Patient-related factors

#### 2.1.1. Age and gender

In CD, younger age has been associated with better response to anti-TNF treatment in some studies, mainly including infliximab.<sup>13,14</sup> However, many other studies were not able to find any relationship between age and response to infliximab,<sup>15-21</sup> adalimumab,<sup>19,21-23</sup> or certolizumab.<sup>19,24,25</sup> Furthermore, some studies have reached opposite conclusions, showing that older age is associated with a higher probability of response.<sup>26</sup> Similarly in UC patients, controversial results have also been reported, with studies showing an association between younger age,<sup>27</sup> older age<sup>28,29</sup> or, most frequently, no relation at all.<sup>30-42</sup>

Several studies have evaluated the association between gender and the response of CD patients to anti-TNF agents, and most of them have not found any relationship, either with infliximab,<sup>14,15,18,21</sup> adalimumab,<sup>21-23</sup> or certolizumab.<sup>24</sup> One single study has suggested a better response in male CD patients.<sup>20</sup> Similarly in UC patients, no association has been reported, in general, between gender and response to infliximab,<sup>29-37</sup> adalimumab,<sup>38</sup> or golimumab,<sup>41,42</sup> although there are some exceptions suggesting a more favourable response in females.<sup>39,40,43</sup> In summary, the age or the gender of the IBD patient when anti-TNF therapy is administered cannot be used as a reliable marker to predict the response to these drugs.

#### 2.1.2. Weight

Observational studies in various rheumatic diseases have shown a negative impact of obesity on response to therapy, including both anti-TNF agents that are dosed based on body weight [infliximab] as well as fixed-dosing regimens [adalimumab, golimumab, certolizumab, or etanercept].<sup>44</sup> This may be attributed to low systemic drug exposure resulting in low trough concentrations in obese individuals [as has been observed in population pharmacokinetic studies], or may be attributed to obesity-induced low-grade inflammation, which can lead to higher systemic inflammatory burden.<sup>44</sup>

However, these results have been inconsistent in patients with IBD. In CD, some studies have found a higher response rate in

**Table 1.** Predictors of favourable response to biologic agents in Crohn's disease.

| Parameter                                                                       | Infliximab                                           | Adalimumab                          | Certolizumab            | Golimumab | Vedolizumab                                            | Ustekinumab                                         |
|---------------------------------------------------------------------------------|------------------------------------------------------|-------------------------------------|-------------------------|-----------|--------------------------------------------------------|-----------------------------------------------------|
| Age                                                                             | Yes:<br>- Younger: 13,14<br>- Older: 26<br>No: 15-21 | Yes:<br>- Older: 26<br>No: 19,21-23 | No: 19,24,25            |           | No: 80,169-174                                         | Yes:<br>- Younger: 184<br>No: 81,185-188            |
| Gender                                                                          | Yes:<br>- Male: 20<br>No: 14,15,18,21                | No: 21-23                           | No: 24                  |           | No: 80,90,169-174                                      | Yes:<br>- Female: 184<br>No: 81,185-188             |
| Weight                                                                          | Yes:<br>- Low: 20,45<br>- High: 14                   | Yes:<br>Low: 45                     |                         |           |                                                        | Yes:<br>- Low: 189<br>No: 186,187<br>No: 81,185,186 |
| Smoking [no]                                                                    | Yes: 49-52<br>No: 13-21,26,50,54-56                  | Yes: 52,53<br>No: 19,21,22,26       | No: 19                  |           | Yes: 80<br>No: 90,169,170,172-174                      | No: 81,185,186                                      |
| Disease duration [short]                                                        | Yes: 21,60-63<br>No: 13-16,18-20,49,50,69            | Yes: 21,64,65<br>No: 19,22,23       | Yes: 66-68<br>No: 19,24 |           | No: 80,90,169-174                                      | Yes: 184<br>No: 81,185-188                          |
| Disease location/extension [colon]                                              | Yes: 13,20,50,68<br>No: 14,17,18,21,26,49,69         | No: 21,22,26,72                     | No: 24                  |           | Yes: 171<br>No: 80,169,170,172-174                     | Yes: 184<br>No: 186,188,189                         |
| Disease behaviour [inflammatory]                                                | Yes: 13,15,26,52<br>No: 14,17,26,49                  | Yes: 26,52,53,72                    |                         |           | No: 80,90,169,172-174                                  | Yes:<br>No: 185-188                                 |
| Disease severity [less severe]                                                  |                                                      | No: 23                              | Yes: 25,65              |           | Yes: 80,169,174<br>No: 90,170,172                      | No: 189 [better response if more severe]            |
| Extraintestinal manifestations                                                  | No: 14                                               |                                     |                         |           | No: 80,169,170                                         |                                                     |
| Previous surgery [no]                                                           | Yes: 13,14,17<br>No: 15,18,21,26,50,80,81            | Yes: 23<br>No: 21,22,26             |                         | Yes: 25   | Yes: 174<br>No: 90,170,171                             | Yes: 186<br>No: 188                                 |
| CRP [high]                                                                      | Yes: 71,72,84-91<br>No: 15,93<br>14,20,21,193        | Yes: 64,72<br>No: 21,23             | Yes: 67,92<br>No: 24    |           | Yes: 90<br>No: 169,174 [better response if low levels] | No: 81,186,187                                      |
| Haemoglobin [high]                                                              | No: 20                                               | No: 23                              |                         |           | No: 170,174                                            |                                                     |
| Leukocyte count [high]                                                          |                                                      | No: 23                              |                         |           | No: 169                                                |                                                     |
| Platelet count [high]                                                           | Yes: 95                                              | No: 23                              |                         |           |                                                        |                                                     |
| pANCA-/ASCA+                                                                    | No: 50,100                                           |                                     |                         |           |                                                        |                                                     |
| cANCA+                                                                          | Yes: 111                                             |                                     |                         |           |                                                        |                                                     |
| TNF levels [low]                                                                | Yes: 145<br>No: 84,91,146                            |                                     |                         |           |                                                        |                                                     |
| Faecal calprotectin                                                             | Yes:<br>- Low: 102<br>- High: 103                    |                                     |                         |           | No: 170 [better response if low levels]                |                                                     |
| Vitamin D levels [low]                                                          | Yes: 194                                             |                                     |                         |           |                                                        |                                                     |
| Peripheral regulatory T cells                                                   | Yes: 195                                             |                                     |                         |           |                                                        |                                                     |
| Genetic polymorphisms                                                           | Yes: 19,111-125<br>No: 13,84,127-136                 | Yes: 19,118,123,126<br>No: 137      | Yes: 19                 |           |                                                        |                                                     |
| FcγRIIIa genotype                                                               | Yes: 140                                             |                                     |                         |           |                                                        |                                                     |
| Apoptosis genes [Fas ligand-843CC/CT, caspase-9 93 TT]                          | Yes: 55,139                                          |                                     |                         |           |                                                        |                                                     |
| Concomitant steroids [yes]                                                      | Yes: 50,145<br>No: 15,84,196                         |                                     |                         |           | Yes: 169<br>No: 80,172                                 | No: 81,185,188                                      |
| Previous anti-TNF [no response]                                                 | Yes: 141                                             | Yes: 23                             |                         |           | Yes: 80,175,176<br>No: 90,170,172-174                  | Yes: 184,188<br>No: 185,186                         |
| Expression of α4β7 in blood [T, B, and NK cells]                                |                                                      |                                     |                         |           | Yes: 179                                               |                                                     |
| Proteomics                                                                      | Yes: 150-152,197                                     |                                     |                         |           | Yes: 180                                               |                                                     |
| Cytokines expression in colonic mucosa                                          | Yes: 148,165                                         |                                     |                         | Yes: 148  |                                                        |                                                     |
| TNF in the intestinal mucosa                                                    | Yes: 162 [high]                                      |                                     |                         |           |                                                        |                                                     |
| Intestinal mTNF[+] immune cells [molecular imaging with fluorescent antibodies] | Yes: 161                                             |                                     |                         |           |                                                        |                                                     |
| Plasma cells and inflammatory macrophages in colonic mucosa                     | Yes: 168                                             |                                     |                         |           |                                                        |                                                     |
| CD19+ cells in colonic mucosa                                                   | Yes: 159                                             |                                     |                         |           |                                                        |                                                     |
| Faecal microbiota                                                               |                                                      |                                     |                         |           | Yes: 178                                               |                                                     |

TNF, tumour necrosis factor; CRP, C-reactive protein; pANCA, perinuclear antineutrophil cytoplasmic antibody; ASCA, anti-*Saccharomyces cerevisiae* antibody; sANCA, speckled antineutrophil cytoplasmic antibody.

**Table 2.** Predictors of favourable response to biologic agents in ulcerative colitis.

| Parameter                                                                                                                                                                                                                                                          | Infliximab                                                                                                                                                    | Adalimumab                                                         | Certolizumab       | Golimumab                                         | Vedolizumab                                                                                                |
|--------------------------------------------------------------------------------------------------------------------------------------------------------------------------------------------------------------------------------------------------------------------|---------------------------------------------------------------------------------------------------------------------------------------------------------------|--------------------------------------------------------------------|--------------------|---------------------------------------------------|------------------------------------------------------------------------------------------------------------|
| Age                                                                                                                                                                                                                                                                | Yes:<br>- Younger: <sup>27</sup><br>- Older: <sup>28,29</sup><br>No: <sup>30-37</sup>                                                                         | No: <sup>38-40</sup>                                               |                    | No: <sup>41,42</sup>                              | No: <sup>80,169-173</sup>                                                                                  |
| Gender                                                                                                                                                                                                                                                             | Yes:<br>- Female: <sup>43</sup><br>No: <sup>30-32,29,33-37</sup>                                                                                              | Yes:<br>-Female: <sup>39,40</sup><br>No: <sup>38</sup>             |                    | No: <sup>41,42</sup>                              | No:<br><sup>80,90,169-173</sup>                                                                            |
| Weight                                                                                                                                                                                                                                                             | Yes:<br>- Low: <sup>45</sup><br>No: <sup>31</sup>                                                                                                             | Yes:<br>- Low: <sup>45,47</sup>                                    |                    |                                                   |                                                                                                            |
| Smoking [no]                                                                                                                                                                                                                                                       | Yes: <sup>37</sup> [active smokers and never smokers [vs ex-smokers]<br>No: <sup>27,29-36</sup>                                                               | Yes: <sup>39,40</sup><br>No: <sup>38</sup>                         |                    |                                                   | Yes: <sup>80</sup><br>No:<br><sup>90,169,170,172,173</sup>                                                 |
| Disease duration                                                                                                                                                                                                                                                   | Yes:<br>- Shorter: <sup>36</sup><br>- Longer: <sup>71</sup><br>No: <sup>28,30,32V</sup>                                                                       | No: <sup>38,40</sup>                                               |                    | Yes: <sup>41</sup> [shorter]<br>No: <sup>42</sup> | No:<br><sup>80,90,169-173</sup>                                                                            |
| Disease location/extension [pancolitis]                                                                                                                                                                                                                            | Yes: <sup>32</sup> [more extensive disease]<br>No: <sup>30,31,33-36</sup>                                                                                     | Yes: <sup>47</sup> [less extensive disease]<br>No: <sup>40</sup>   |                    | No: <sup>42</sup>                                 | No:<br><sup>80,169,170,172,173</sup>                                                                       |
| Disease severity [less severe]                                                                                                                                                                                                                                     | Yes: <sup>33,37,77,78</sup><br>No: <sup>28,29,31,33,34,36,71,79</sup>                                                                                         | Yes: <sup>40,47,78</sup>                                           |                    | Yes: <sup>97</sup>                                | Yes: <sup>80,169,172</sup><br>No: <sup>90,170,173</sup><br>No: <sup>80,170</sup><br>Yes: <sup>90,169</sup> |
| Extraintestinal manifestations<br>CRP [low]                                                                                                                                                                                                                        | Yes: <sup>27,29</sup><br>No: <sup>32,34,35,37</sup>                                                                                                           | Yes: <sup>47</sup><br>No: <sup>38,39</sup> [high] <sup>40</sup>    |                    |                                                   | No: <sup>170</sup>                                                                                         |
| Haemoglobin [high]                                                                                                                                                                                                                                                 | Yes: <sup>33,35,89</sup>                                                                                                                                      |                                                                    |                    |                                                   |                                                                                                            |
| Albumin [high]                                                                                                                                                                                                                                                     | Yes: <sup>29,35,37,78,96</sup><br>No: <sup>14,36,91</sup>                                                                                                     | Yes: <sup>78</sup>                                                 | Yes: <sup>97</sup> |                                                   |                                                                                                            |
| pANCA-/ASCA+<br>TNF levels [low]                                                                                                                                                                                                                                   | Yes: <sup>79,91,99</sup><br>No: <sup>14,146</sup>                                                                                                             |                                                                    |                    |                                                   |                                                                                                            |
| Cytokines expression in serum<br>Faecal calprotectin [high]                                                                                                                                                                                                        | Yes: <sup>34,147-149</sup><br>Yes: <sup>36</sup><br>No: <sup>34,35,104</sup>                                                                                  |                                                                    |                    | Yes: <sup>148</sup>                               | No: <sup>170</sup>                                                                                         |
| Genetic polymorphisms<br>Cultured blood T cell responses<br>Concomitant steroids [yes]                                                                                                                                                                             | Yes: <sup>118,120,125</sup><br>Yes: <sup>198,199</sup><br>No: <sup>33-35</sup>                                                                                | Yes: <sup>118</sup><br>Yes: <sup>198</sup><br>No:<br><sup>38</sup> |                    | Yes: <sup>198</sup>                               | No: <sup>80,169,172</sup>                                                                                  |
| Previous anti-TNF [no response]                                                                                                                                                                                                                                    | Yes: <sup>141</sup>                                                                                                                                           | Yes: <sup>40</sup>                                                 |                    | Yes: <sup>41,42</sup> [2 or more]                 | Yes: <sup>80,176,177</sup><br>No:<br><sup>90,170,172,173</sup><br>Yes: <sup>180</sup>                      |
| Proteomics<br>TNF in colorectal mucosa<br>Gene expression in colorectal mucosa<br>Cytokines expression in colonic mucosa<br>Plasma cells and inflammatory<br>macrophages in colonic mucosa<br>Mucosal expression of transcription factor<br>Th1-Tbet and Th17-Rorc | Yes: <sup>152,197</sup><br>Yes: <sup>160,200</sup><br>Yes: <sup>156,157,160,163,164</sup><br>Yes: <sup>34</sup><br>Yes: <sup>168</sup><br>Yes: <sup>166</sup> |                                                                    |                    | Yes: <sup>167</sup>                               |                                                                                                            |

CRP: C-reactive protein; TNF, tumour necrosis factor; pANCA perinuclear antineutrophil cytoplasmic antibody; ASCA, anti-*Saccharomyces cerevisiae* antibody; sANCA, speckled antineutrophil cytoplasmic antibody .

patients with lower weight treated with either infliximab<sup>20,45</sup> or adalimumab,<sup>45,46</sup> whereas others have reached opposite results [that is, better results in patients with a higher weight].<sup>14</sup> Similarly, controversial results have also been reported for UC patients [better response in lower weight<sup>45,47</sup> in some studies, and no association in others<sup>31</sup>]. Nevertheless, the lack of an association between body mass index [BMI] and response to infliximab in particular might simply reflect the weight-based dosing of infliximab [i.e., higher in heavier patients].

Recently, Singh *et al.* assessed whether obesity may affect response to infliximab, conducting an individual participant data pooled analysis using data from four clinical trials of infliximab in IBD [ACCENT-I, SONIC, ACT-1, and ACT-2, including 1205 patients], using the Yale Open Data Access [YODA] Project.<sup>44</sup> Obesity was not associated with odds of achieving clinical remission. These results were consistent across strata based on disease type [CD and UC] and trial design [induction and maintenance therapy]. Therefore the authors concluded that, based on individual participant data

pooled analysis, obesity is not associated with inferior response to infliximab in patients with IBD.

In summary, obesity [or low weight] does not seem to have a clear impact on response to anti-TNF therapy, although more studies evaluating this potential association specifically for each anti-TNF agent [infliximab, adalimumab, etc.] are required to definitively clarify this issue.

### 2.1.3. Smoking

Smoking is known to negatively influence disease course in CD patients.<sup>48</sup> Smokers with CD have a more complicated disease course than non-smokers, and quitting smoking may ameliorate this.<sup>48</sup> However, although some studies have suggested that CD non-smokers tend to respond better to anti-TNF therapy, either with infliximab<sup>49–52</sup> or with adalimumab,<sup>52,53</sup> most of the studies have not been able to find any relationship between smoking habit and treatment efficacy.<sup>13–22,26,50,54–56</sup>

Two meta-analyses have evaluated the role of smoking habit in treatment response of CD patients. The first, published in 2009, found no effect of tobacco smoking on the efficacy of infliximab in CD patients.<sup>57</sup> A second meta-analysis, published in 2015, also concluded that the relative risk of non-response was not significantly different in smokers.<sup>58</sup> However, the studies included in this last meta-analysis were all conducted to assess induction, not maintenance. Finally, it should be noted that studies examining the epidemiology of smoking and CD have used various definitions of smoking, in terms of both the number of cigarettes per day and the length of time the individual has smoked, which constitutes an additional limitation of the aforementioned meta-analyses.

In UC patients, the influence of smoking habit on anti-TNF treatment response has also been controversial, most studies reporting no relationship<sup>27,29–36,38</sup> and only a few studies suggesting a negative effect of smoking.<sup>37,39,40</sup>

In summary, although smoking is known to have an indisputable negative effect on the course of CD as well as other organ systems, its impact on the efficacy of anti-TNF therapy for CD has not been confirmed. Therefore, although it is reasonable to aggressively discourage smoking, it should not influence the decision to initiate anti-TNF treatment.

## 2.2. Disease-related factors

### 2.2.1. Disease duration

Disease duration has been evaluated with the hypothesis that patients with shorter disease duration will have a better response to early treatment.<sup>59</sup> This was demonstrated in post-hoc analyses from large clinical trials where patients with a disease duration shorter than 2 years had a higher chance of responding to anti-TNFs than those with more long-standing disease.<sup>59</sup> Thus, some studies have confirmed that CD patients with a shorter disease duration tend to respond better to anti-TNF treatment, either with infliximab,<sup>21,60–63</sup> adalimumab,<sup>21,64,65</sup> or certolizumab.<sup>66–68</sup> However, many other authors could not confirm this association in patients treated with anti-TNF agents [infliximab,<sup>13–16,18–20,49,50,69</sup> adalimumab,<sup>19,22,23</sup> or certolizumab<sup>19,24</sup>].

Intuitively though, treating patients earlier, when inflammatory disease predominates over fibrosis, is appealing.<sup>70</sup> On the other hand, worse response to treatment in patients with longer disease duration may be due to several factors, including a selection bias of patients with more severe disease and also a greater proportion of advanced fibrosing organ damage. In rheumatoid arthritis, there is

already considerable support for the use of anti-TNF in early disease to modify favourably the disease course.

In UC patients, however, this correlation between shorter disease duration and a better response to anti-TNF treatment has not been shown. In fact, some studies have suggested that patients with longer disease duration tend to respond better to anti-TNF agents,<sup>71</sup> but others reported opposite results<sup>36,41</sup> or, most frequently, no association at all.<sup>28,30,32–35,37,38,40,42</sup>

In summary, those patients with a shorter CD duration may have a higher chance of responding to anti-TNF agents than those with more long-standing disease. However, this association has not been consistently reported, so more studies are necessary to confirm it.

### 2.2.2. Disease location/extension

Some studies have suggested that CD patients with isolated colonic disease tend to have a better response to anti-TNF treatment [specifically to infliximab], whereas isolated ileitis has been associated with poor response.<sup>13,20,50,68</sup> This observation could be explained by the fact that localised ileal stricturing disease may be associated with primary non-response to anti-TNF agents [see next section], but data have been conflicting. In fact, many other studies have been unable to find any association between disease location and probability of therapeutic response to infliximab,<sup>14,17,18,21,26,49,69</sup> adalimumab,<sup>21,22,26,72</sup> or certolizumab.<sup>24</sup> Moreover, in UC patients, disease location/extension has not been associated in general with anti-TNF response,<sup>30,31,33–36,40</sup> although some exceptions exist [better<sup>32</sup> or poorer<sup>47</sup> response in more extensive disease]. In summary, there does not seem to be a consistent pattern of response related to the disease location or extension, either in CD or in UC patients.

### 2.2.3. Disease behaviour/phenotype

Disease phenotype of CD patients, as defined by the Montreal classification, may potentially be associated with anti-TNF treatment response. In general, patients with a simple inflammatory disease behaviour should be expected to have more benefit from anti-TNF-therapy than patients with a complicating [stenosing or fistulising] phenotype,<sup>13,15,26,52,53,72</sup> although not all the studies are in agreement.<sup>14,17,26,49</sup> In particular, fibrostenotic disease may have lower response rates and may be more suitable for surgical resection or endoscopic dilatation therapy. However, some patients with a stricturing phenotype may still respond well, especially when an inflammatory component is also present.<sup>73</sup> In summary, luminal inflammatory CD seems to be associated with a better response to anti-TNF treatment, whereas a stricturing phenotype has been associated with reduced response.

### 2.2.4. Disease severity

In CD, only a few studies have assessed the influence of disease severity on probability of response to anti-TNF therapies, with controversial results [better response in less severe CD,<sup>25,65</sup> or no association<sup>23</sup>]. In CD, the lack of a clear agreement on disease severity definition is more evident [compared with UC] with a consequently less defined scenario. On the other hand, anti-TNF therapies have shown lower efficacy [and higher risk of colectomy] in more severe UC patients due, possibly, to a greater drug clearance and loss of drug in the stools.<sup>74–76</sup> Faecal loss of anti-TNF into the stool via the ulcerated, denuded mucosa has been hypothesised as the mechanism for primary non-response in patients with very high inflammatory disease burden. Reduced UC severity has been associated with higher response rates,<sup>33,37,40,47,77,78</sup> although not all authors have confirmed

this observation.<sup>28,29,31,33,34,36,71,79</sup> It has been suggested that, from the purely clinical standpoint, the best candidate for anti-TNF administration may be an outpatient with moderate to severe UC but not severe disease requiring hospitalisation, although this hypothesis has not been validated. In summary, some studies appear to support the notion that severe UC shows a less favourable response to treatment with anti-TNF, although this association needs to be confirmed in future studies.

#### 2.2.5. Previous surgery

Some studies in CD patients have reported that a history of previous resectional surgery is a negative predictive factor of response to anti-TNF treatment.<sup>13,14,17,23</sup> It may be speculated that this group of patients might correspond to those that are prone to stricturing and may represent a more aggressive disease phenotype and therefore a more refractory disease. Nevertheless, most of the studies have not been able to find an association between previous surgery and anti-TNF response.<sup>15,18,21,22,26,50,80,81</sup> In summary, the influence of a history of previous surgery on anti-TNF therapy has not been clearly demonstrated.

#### 2.2.6. C-reactive protein

Among the various laboratory biomarkers of inflammation, C-reactive protein [CRP] has been the most extensively applied to clinical practice.<sup>82</sup> However, it is unclear whether pre-treatment CRP, *per se*, is predictive of response to anti-TNF therapy. Thus, whether an elevated CRP is truly predictive of response to anti-TNF or simply a marker that symptoms are due to active inflammatory disease remains to be proven.<sup>83</sup> Many studies have confirmed an association between elevated CRP and response to anti-TNF treatment in CD, including infliximab,<sup>71,72,84-91</sup> adalimumab,<sup>64,72</sup> and certolizumab.<sup>67,92</sup> On the contrary, in UC patients, several studies have confirmed an association between low CRP levels and a better response to anti-TNF treatment, including infliximab<sup>27,29</sup> and adalimumab.<sup>47</sup> Moreover, several authors could not find any association between CRP levels and response to anti-TNF treatment either in CD<sup>14,15,20,21,23,24,93</sup> or in UC.<sup>32,34,35,37,38,40</sup> These discrepancies may be due to the fact that CRP is associated with an inflammatory phenotype, but also with more severe disease. Thus, it has been suggested that an elevated baseline CRP may be a double-edged sword. Whereas a high baseline CRP weeds out some patients with non-inflammatory functional symptoms and predicts higher overall response, it may also reflect a higher inflammatory load, contributing to faster drug elimination, leading to a decreased response in some patients with elevated CRP.<sup>94</sup> In summary, although in general there seems to be an association between elevated CRP and response to anti-TNF treatment in CD, these drugs should not be restricted to patients with an elevated CRP, as almost 50% of those with a normal value respond.<sup>84</sup> In this respect, it is well established that the sensitivity of CRP is limited in CD, as almost 30% of patients have a normal level despite clinically active disease.<sup>94</sup>

#### 2.2.7. Blood count parameters

Some studies have reported a correlation between higher haemoglobin levels and response of UC to anti-TNF treatment,<sup>33,35,89</sup> whereas others could not confirm this finding in CD.<sup>20,23</sup> Only one study has evaluated the possible association between leukocyte count and response to anti-TNF treatment [adalimumab in CD], and no correlation was found.<sup>23</sup> Finally, only two studies have evaluated the possible association between platelet count and

the probability to respond to anti-TNF agents, with controversial results.<sup>23,95</sup>

#### 2.2.8. Albumin

The association between albumin levels and response to anti-TNF treatment in CD patients has not been properly evaluated. However, this association has been assessed by several studies in UC patients. In patients with acute severe UC, infliximab levels were significantly lower in comparison with moderate UC during the induction phase, and were significantly correlated with albumin levels.<sup>94</sup> Thus, several studies have reported higher response rates in UC patients with higher albumin levels, treated with either infliximab,<sup>29,35,37,78,96</sup> adalimumab,<sup>78</sup> or certolizumab.<sup>97</sup> Nevertheless, other studies [although a minority] could not confirm this association.<sup>14,36,91</sup> In summary, low serum albumin levels have been consistently associated with diminished response to anti-TNF treatment. This relationship was also reflected by the lower infliximab serum levels in hypoalbuminaemic patients, and is probably explained by the common mechanism responsible for protection from catabolism of both albumin and monoclonal antibodies [which belong to the IgG class of immunoglobulins], namely the neonatal Fc receptor [FcRn].<sup>75,94,96</sup>

#### 2.2.9. Perinuclear anti-neutrophil cytoplasmic antibodies and anti-*Saccharomyces cerevisiae* antibodies

Perinuclear anti-neutrophil cytoplasmic antibodies [pANCA] and anti-*Saccharomyces cerevisiae* antibodies [ASCA] are serological markers that have been associated with UC and CD, respectively.<sup>98</sup> Most recently, these antibodies have been studied as predictors of response to anti-TNFs. Some studies have suggested that positivity of pANCA could predict response to infliximab in UC patients,<sup>79,91,99</sup> but others could not confirm this in CD patients.<sup>50,100</sup> A meta-analysis determined that pANCA-positive patients had almost a 2-fold lower response compared with pANCA-negative patients<sup>101</sup>; however, the results were not impressive: serological testing for pANCA+ predicting non-response to infliximab therapy showed a sensitivity of 25%, a specificity of 85%, a positive predictive value of 41%, and a negative predictive value of 74%. In summary, despite data supporting their value in predicting response to anti-TNF therapy, pANCA and ASCA have not been used widely as they are not sufficiently predictive of response when analysed in isolation.<sup>98</sup> These serological markers may be of greater utility when applied as part of a predictive model with clinical and other predictive factors.<sup>83</sup>

#### 2.2.10. Faecal markers

Faecal calprotectin and lactoferrin are surrogate markers of luminal disease activity, which have been suggested to predict clinical response to anti-TNF therapy.<sup>83</sup> [see above], and this capacity has been demonstrated in a few studies, both in CD<sup>102,103</sup> and in UC<sup>36</sup> patients. However, in some studies a higher calprotectin level was predictive of a better response,<sup>103</sup> whereas in others the association was inverse.<sup>102</sup> Furthermore, there are also studies that have not been able to confirm any of the aforementioned associations.<sup>34,35,104</sup> In summary, it seems that the levels of faecal calprotectin are not useful in predicting the response of a particular patient to anti-TNF therapy. Finally, it has been reported that metabolic network reconstruction and assessment of metabolic profiles of faecal samples might be used to identify patients with IBD likely to achieve clinical remission following anti-TNF therapy.<sup>105</sup>

### 2.2.11. Genetic polymorphisms

Pharmacogenetic studies may help identify patients likely to benefit from a given treatment and also the pathways by which a drug works. Furthermore, the identification of genetic profiles characterising the non-responders may lead to understanding of the mechanisms that are active in these patients and may suggest targets for treatment strategies.<sup>6</sup> Genetic biomarkers have the advantage that they do not change over time. Most studies have investigated genes related to cytokines and their receptors [especially TNF] or immunoglobulin receptors.

Genome-wide association studies [GWAS] have already indicated that it is unlikely that there are genetic variants with large effect sizes on the composite disease-response scores routinely measured in clinical practice.<sup>106</sup> However, certain genetic polymorphisms have been proposed to predict the probability of response to anti-TNFs in IBD.<sup>70,107–109</sup> A connection has been observed between some genes described as possible predictors of response to anti-TNF drugs in IBD and the cytokines and molecules involved in the T helper 17 pathway.<sup>110</sup> In particular, several studies have found an association between several polymorphisms and the response to infliximab, both in CD<sup>19,111–125</sup> and in UC.<sup>118,120,125</sup> This association has also been reported in patients treated with adalimumab<sup>19,118,123,126</sup> or certolizumab.<sup>19</sup> However, many other studies have concluded that different polymorphisms are not able to predict the efficacy of anti-TNF treatment.<sup>13,84,127–137</sup> Importantly, none of the described genetic factors could be reproduced in a large and well-designed study, and currently no specific polymorphism or gene is a reliable marker for prediction of response to biologics.<sup>94,106</sup>

A meta-analysis performed in 2013 explored whether TNF $\alpha$  promoter -308 A/G and -857 C/T polymorphisms have an association with responsiveness to anti-TNF agents in IBD.<sup>138</sup> In total, 392 IBD patients were included. The results showed that the common allele [G and C, respectively] showed a better responsiveness than the minor allele [A and T, respectively]. More recently, another systematic review and meta-analysis aimed to identify polymorphisms and candidate genes from the literature which are associated with anti-TNF treatment response in patients with IBD, considering available studies including at least 100 IBD patients.<sup>6</sup> Polymorphisms in *FCGR3A* [rs396991], *TLR4* [rs5030728], *TNFRSF1A* [rs4149570], *IFNG* [rs2430561], *IL6* [rs10499563], and *IL1B* [rs4848306] genes were significantly associated with improved response, whereas *TLR2* [rs3804099] and *TLR9* [rs352139] variants were associated with reduced response.<sup>6</sup>

Finally, induction of apoptosis is a key mechanism by which infliximab and adalimumab exert their anti-inflammatory effects, suggesting that apoptosis-related genes may also influence response to therapy. Hlavaty *et al.* developed and studied an apoptotic pharmacogenetic index in a small retrospective study using three single nucleotide polymorphisms [SNPs]: Fas ligand-843 C/T, Fas-670 G/A, and Caspase9 93 C/T. They found that higher apoptotic pharmacogenetic index score correlated with better response rates to anti-TNFs.<sup>55,139</sup> Other authors have found an association between Fc $\gamma$ RIIIa genotype and response to infliximab.<sup>140</sup>

In summary, emerging GWAS suggest that there may be a number of genes with modest effects on treatment response, rather than a few genes with large effect.<sup>106</sup> Many genes have been explored, and despite some polymorphisms emerging with a great potential, particularly in members of the TNF family, the overall results are poor and no good predictive biomarkers for anti-TNF response adequate for use in the clinic have been established.<sup>6,109</sup> Therefore, hypothesis-free approaches, testing a large number of polymorphisms in large,

well-characterised cohorts, are required in order to identify genetic profiles with larger effect sizes, which could be employed as biomarkers for treatment selection in clinical settings.<sup>6</sup>

### 2.2.12. Previous anti-TNF therapy

Some studies have shown that in IBD patients, previous anti-TNF therapy is a risk factor for treatment failure with another anti-TNF agent, including either infliximab,<sup>141</sup> adalimumab,<sup>23,40,41,42</sup> or golimumab.<sup>41,42</sup> A systematic review and meta-analysis concluded that the efficacy of a second anti-TNF in CD patients largely depends on the cause for switching<sup>142</sup>: the remission rate is higher when the reason to withdraw the first anti-TNF is intolerance [61%] compared with secondary [45%] or primary failure [30%].<sup>142</sup> More information regarding switching to a second anti-TNF agent, after a first one fails, comes from a review of 15 studies [including only two randomised controlled trials] which identified patients who had discontinued infliximab [most of them because of loss of response or intolerance to infliximab] and switched to adalimumab.<sup>143</sup> Remission rates were highly variable across the different studies, with short-term rates between 41% and 83%. Finally, a more recent review also evaluated the efficacy of adalimumab in CD patients for whom infliximab had failed, including 10 studies [one randomised controlled trial]<sup>144</sup> where disease remission rates ranged from 5% to 67% during induction therapy.

## 2.3. Immune-epithelial biomarkers

In a small study, patients who did not respond to infliximab had higher baseline TNF levels.<sup>145</sup> However, a larger study of 226 patients did not find a relationship between treatment response and TNF levels,<sup>84</sup> and these results have been confirmed in two additional more recent studies.<sup>91,146</sup>

Some authors have reported an association between the severity of pro-inflammatory cytokine profile in serum and the response of UC patients to infliximab or golimumab.<sup>147–149</sup>

Up to now, only a few studies have evaluated the role of serum proteomics in the prediction of response to treatment in IBD patients.<sup>150,151</sup> Initially, in 2008, Meuwis *et al.* evaluated 20 CD patients receiving infliximab, and assessed their serum proteomic profiling on Surface Enhanced Laser Desorption Ionization-Time of Flight-Mass Spectrometry [SELDI-TOF-MS].<sup>150</sup> This pioneer proteomic pilot study suggested an association between platelet metabolism and response to infliximab.<sup>150</sup> More recently, Gazouli *et al.* employed proteomics technologies in order to monitor for differences in protein expression in a cohort of patients following infliximab administration.<sup>151</sup> Proteins apolipoprotein A-I, apolipoprotein E, complement C4-B, plasminogen, serotransferrin, beta-2-glycoprotein 1, and clusterin were found to be up-regulated in the primary non-responder and responder groups. Additionally, leucine-rich alpha-2-glycoprotein, vitamin D-binding protein, alpha-1B-glycoprotein, and complement C1r subcomponent were significantly increased in the serum of the remitter group.<sup>151</sup> Finally, Eftekhari *et al.* used physiological intermolecular modification spectroscopy [PIMS] to discriminate IBD patients according to response to anti-TNF treatment.<sup>152</sup> Protein extracts of peripheral blood mononuclear cells from 30 outpatients diagnosed with UC or CD and treated with infliximab were subjected to PIMS analysis, which predicted response to anti-TNF therapy with an accuracy of 96%. Although the aforementioned results seem encouraging, these are preliminary results that should be confirmed/validated on larger cohorts.

We expect the findings at the cell level to be more robust and reproducible than gene biomarkers and more suitable to derive immunological insights and mechanistic hypotheses. This highlights one potential advantage of analysing tissue samples over serum,<sup>153,154</sup> although it is unknown which would produce better results.<sup>11</sup> Concentrations of candidate IBD biomarkers may be higher in the intestinal tissue compared with serum, potentially reducing the chance of false discoveries. On the other hand, although this approach produces valuable physiological information, it has the disadvantage of requiring a pretreatment endoscopy.

Gene-array analysis on colonic mucosal biopsies from IBD patients before starting therapy with infliximab showed a differential gene expression between responders and non-responders.<sup>155</sup> An approach that has been pursued by several groups is the use of microarray analysis to simultaneously measure the RNA expression of thousands of genes to investigate whether gene expression profiles within certain tissues or cell types are associated with treatment outcomes.<sup>155</sup> For example, in a microarray study of pre-treatment rectal mucosal biopsy samples from patients with active UC, a panel of the top five differentially expressed genes [osteoprotegerin—*TNFRSF11B*—, stanniocalcin-1, prostaglandin-endoperoxidase synthase 2, *IL13Ra2*, and *IL11*; all of which are involved in the adaptive immune response] was able to separate responders from non-responders with 95% sensitivity and 85% specificity.<sup>156</sup> In a similar but smaller study of gene expression profiles from pre-treatment mucosal biopsy samples in patients with CD, the same group showed that, in colonic CD, analysis of the top five differentially expressed genes [*TNFAIP6*, *S100A8*, *IL11*, *G0S2*, and *S100A9*] predicted infliximab response with 100% accuracy.<sup>157</sup> A more recent study identified low TREM-1 as a specific biomarker for anti-TNF induced endoscopic remission.<sup>158</sup>

Ferkolj *et al.* conducted, in 2005, the first study that found that a high percentage of CD19+ cells [by flow-cytometry] in the inflamed intestinal mucosa may predict response to infliximab in CD patients.<sup>159</sup>

It has been suggested that high mucosal expression of TNF could be associated with effectiveness of anti-TNF therapy in patients with IBD. Thus, Olsen *et al.* showed an inverse association between pre-treatment TNF expression levels in colorectal mucosa and clinical and endoscopic remission achieved with infliximab treatment in UC patients.<sup>160</sup> Similarly, Atreya *et al.* applied a fluorescent anti-membrane-bound TNF [mTNF] antibody, finding that CD patients with high numbers of mTNF[+] cells on confocal laser endomicroscopy showed significantly higher short-term response rates upon subsequent anti-TNF therapy.<sup>161</sup> Finally, Vatansver *et al.* found that favourable parameters such as clinical remission and mucosal healing were increased in CD patients with high mucosal TNF levels, although results were not statistically significant.<sup>162</sup>

Rismo *et al.*, in 2012, reported that high mRNA expression of mucosal IFN-gamma and IL-17A in biopsies obtained before therapy started was associated with anti-TNF induction therapy response in UC patients.<sup>163</sup> Halloran *et al.*, in 2014, studied 56 colon biopsies from patients with UC and used microarrays to define the mRNA phenotype.<sup>164</sup> Biopsies manifested coordinate transcript changes resembling rejecting transplants, with effector T cell, IFNG-induced, macrophage, and injury transcripts increasing while parenchymal transcripts decreased. When assessed in microarray results from published studies, the disturbance in gene expression, summarised as principal component 1 [PC1], predicted response to infliximab.

Dahlen *et al.*, in 2015, collected mucosal biopsies from 48 UC patients before anti-TNF therapy and evaluated response to the

therapy at Week 14.<sup>34</sup> At baseline, responders had lower mucosal mRNA expression of IL-1b, IL-17A, IL-6, and interferon g [IFN-gamma] than non-responders. In this same way, Zhang *et al.* reported, in 23 patients with CD treated with infliximab, that IL-17 and IL23 tissue expression was much higher in responders than in non-responders.<sup>165</sup>

West *et al.*, in 2017, analysed more than 200 patients with IBD, including two cohorts from phase 3 clinical trials of infliximab and golimumab, and demonstrated that high pre-treatment expression of oncostatin M was strongly associated with failure of anti-TNF therapy.<sup>148</sup> Viazis *et al.*, in 2017, studied a group of 67 patients with UC receiving anti-TNF treatment.<sup>166</sup> Mucosal healing was associated with lower pre-treatment mucosal expression of Th1 transcription factor Tbet and higher expression of Th17-Rorc. In 2018, Telesco *et al.* showed that the gene expression signature identified UC patients treated with golimumab with mucosal healing, with 87% sensitivity but only 34% specificity, limiting its clinical utility.<sup>167</sup>

Finally, in 2018, Gaujoux *et al.* identified altered abundance of plasma cells and inflammatory macrophages in pre-treatment intestinal biopsies of anti-TNF responders versus non-responders. Pathway analysis of the cell-adjusted differentially expressed genes in biopsies suggested an up-regulation of the triggering receptor expressed on myeloid cells 1 [TREM-1] and chemokine receptor type 2 [CCR2]–chemokine ligand 7 [CCL7] axes in non-responders.<sup>168</sup>

### 3. Predictors of Primary Response to Vedolizumab

Vedolizumab is a monoclonal antibody directed against the gut-homing integrin,  $\alpha4\beta7$ . Integrin  $\alpha4\beta7$  is expressed on T cells, B cells, and NK cells as well as subsets of innate immune cells, and binds to mucosal addressin cell adhesion molecule [MAdCAM-1] expressed on the endothelium of gastrointestinal and gut-associated lymphoid tissue.<sup>3</sup>

Among patient-related factors, age<sup>80,169–174</sup> and gender have not been associated with better or worse response to vedolizumab, either in CD or in UC patients.<sup>81,167–172</sup> In agreement with that reported in anti-TNF treated patients, some studies have suggested that CD smokers tend to respond less to vedolizumab.<sup>80</sup> However, the association between smoking habit and response to vedolizumab has not been confirmed by most of the studies.<sup>90,169,170,172–174</sup>

When evaluating disease-related factors, disease duration has not been associated with a higher or lower probability of response to vedolizumab either in CD or in UC.<sup>80,90,169–174</sup> Some studies have suggested that CD patients with isolated colonic disease tend to have a better response to vedolizumab.<sup>171</sup> However, most of the studies have not been able to confirm this association.<sup>80,169,170,172–174</sup> In contrast with anti-TNF treatment, a pure inflammatory disease-behaviour of CD has not been associated with an increased benefit from vedolizumab.<sup>80,90,169,172–174</sup> Only a few studies have assessed the influence of IBD disease severity on the probability of response to vedolizumab, with controversial results: some studies reported better response in less severe CD patients<sup>80,169,174</sup> and others found no association.<sup>90,97,170,172</sup> Most studies could not find any association between previous CD surgery and vedolizumab response.<sup>90,170,171</sup>

Regarding laboratory markers, some studies have confirmed an association between elevated CRP and response to vedolizumab in CD patients<sup>90</sup> [although other authors reached opposite results<sup>174</sup>]. Conversely, in UC patients, several studies have reported an association between low CRP levels and a better response to vedolizumab.<sup>90,169</sup> A correlation between haemoglobin levels<sup>170,174</sup> or



leukocyte count<sup>169</sup> and response to vedolizumab treatment has not been confirmed either in CD or in UC. Faecal calprotectin was not associated with a better or worse response to vedolizumab in a single study.<sup>170</sup>

It was initially suggested that the concomitant use of steroids could increase the efficacy of vedolizumab treatment in CD patients.<sup>169</sup> However, more recently, this association could not be confirmed by other authors, either in CD patients<sup>80,172</sup> or in UC patients.<sup>80,169,172</sup> As previously reviewed in the anti-TNF section, the risk of primary non-response to anti-TNF treatment is higher among patients previously exposed to biologics compared with bio-naïve patients.<sup>3,4</sup> Some studies have shown that previous anti-TNF therapy is also a risk factor for failure of treatment with vedolizumab,<sup>80,175–177</sup> whereas others have reached opposite results, that is the response to vedolizumab is independent of previous anti-TNF failure,<sup>90,170,172–174</sup> in IBD patients.

The composition of the microbiome might affect the clinical response to vedolizumab therapy, but there is a paucity of studies addressing this question. One study showed that baseline community alpha diversity was significantly higher, and *Roseburia inulinivorans* and *Burkholderiales* spp. more abundant, in patients with CD who achieved remission at Week 14 of vedolizumab treatment than in patients who did not achieve remission.<sup>178</sup> Furthermore, 13 pathways including branched chain amino acid synthesis were significantly enriched in baseline samples from patients who achieved remission. Thus, the longitudinal course of early microbiome changes could represent a marker of response to vedolizumab treatment.

Regarding immune-epithelial biomarkers, one study found that the expression of  $\alpha 4\beta 7$  in blood [T, B, and NK cells] was a superior biomarker for vedolizumab response than any reported outcomes associated with disease severity [CRP, albumin, and clinical scores].<sup>179</sup> A retrospective single-centre cohort study of 28 patients with IBD receiving vedolizumab applied Multiplex ELISA to quantify 47 pre-selected plasma proteins based on their putative involvement in the inflammatory process in IBD.<sup>180</sup> Vedolizumab non-responders had significantly higher levels of circulating IL-6 than those responding to vedolizumab. A small pilot study that used molecular imaging of  $\alpha 4\beta 7$  integrins suggested that low or absent integrin expression in the colonic mucosa before treatment might result in primary non-responsiveness to vedolizumab in patients with CD.<sup>181</sup> In this respect, in the randomised controlled phase II trial of another anti-integrin therapy, etrolizumab [a humanised monoclonal antibody that selectively binds the  $\beta 7$  subunit of the heterodimeric integrins  $\alpha 4\beta 7$  and  $\alpha E\beta 7$ ], the presence of baseline colonic  $\alpha E$  expression detected by flow cytometry assays improved response to the drug.<sup>182</sup> In this same line, Tew *et al.* compared differences in colonic expression [by immunohistochemistry and gene expression profiling] of the integrin  $\alpha E$  gene between UC patients who achieved clinical remission with etrolizumab versus those who did not.<sup>183</sup> Colon tissues collected at baseline from patients who had a clinical response to etrolizumab expressed higher levels of T cell-associated genes than patients who did not respond.

#### 4. Predictors of Primary Response to Ustekinumab

Ustekinumab is a monoclonal antibody directed against the p40 subunit shared by IL-12 and IL-23.<sup>4</sup> Few studies have investigated associations between clinical, biological, or pharmacological parameters and responsiveness to ustekinumab. With respect to patient-related

factors, with some exceptions,<sup>184</sup> age,<sup>81,185–188</sup> gender,<sup>81,185–188</sup> and smoking habit<sup>81,185,186</sup> have not been associated with better or worse response to ustekinumab. Regarding disease-related factors, disease duration<sup>81,185–188</sup> or location<sup>185,187,188</sup> have not been associated with a higher or lower probability of response to ustekinumab, although some exceptions have been reported.<sup>184</sup> In contrast with anti-TNF treatment, a pure inflammatory disease-behaviour of CD has not been consistently associated with an increased benefit from ustekinumab.<sup>185–188</sup> A single study has suggested a better response to ustekinumab in patients with a more severe CD.<sup>189</sup> One study has reported that a history of previous surgery is a negative predictive factor of response to ustekinumab treatment,<sup>186</sup> but this has not been confirmed by another study.<sup>188</sup> Unlike anti-TNF treatments, an association between high CRP levels and a favourable response to treatment has not been reported for ustekinumab in CD patients.<sup>81,186,187</sup> The concomitant use of steroids has not been associated with a higher response rate to ustekinumab.<sup>81,185,188</sup> Finally, some studies have shown that previous anti-TNF therapy is a risk factor for treatment failure with ustekinumab,<sup>184,188</sup> whereas others have reported that the response to ustekinumab is independent of previous anti-TNF failure.<sup>185,186</sup>

#### 5. Limitations of Studies Evaluating Predictors of Response

The studies carried out so far evaluating predictors of response to biologic treatments in IBD have relevant limitations, which are summarised as follows.

- 1] The first and most obvious limitation is that the number of studies performed in patients with IBD which have assessed the association between each biologic drug and each of the potential predictive factors is still relatively small.
- 2] Most studies have a relatively small sample size, and consequently have insufficient statistical power.
- 3] Most of the studies have a retrospective design, with the consequent shortcomings of this.
- 4] Another limitation is the heterogeneity of the type of patients who have been included in the studies. Thus, some studies included IBD patients [without separation between CD and UC], and others included only CD or UC. Furthermore, much of our knowledge regarding biologic therapies derives from registrational trials, where patient selection is dramatically different from what actually happens in real life. Finally, in almost all the studies, patients had received different medical treatments—in addition to the biologic drug—which potentially could affect the efficacy results. On the other hand, for some ‘inconsistent correlations’ of predictors with outcome, this could be due to a U-shape correlation, rather than a linear one; this is especially true for weight variables where probably both the very lean and the very obese are more prone to fail.<sup>190,191</sup> This U-shape phenomenon is probably true also for CRP where normal [suggesting irritable bowel syndrome symptoms] and very high [indicating inflammatory burden and/or infectious complication] are both associated with no response in several studies.
- 5] The vast majority of predictive studies have only evaluated serum biomarkers, and only a few studies have assessed biomarkers in intestinal mucosa from IBD patients. As previously mentioned, although due to its non-invasive nature serum measurements would seem ideal, it is not evident that blood

markers faithfully reflect the pathogenic process that actually occurs in the intestinal mucosa.

- 6] Most of the studies carried out to date on response prediction in IBD patients have evaluated anti-TNF drugs. However, in current clinical practice, physicians can choose among several other biologic treatments, including also vedolizumab and ustekinumab, where the information is much more limited.
- 7] Most of the studies which have evaluated the relationship between biomarkers and the efficacy of biologic therapy in IBD have been based solely on pre-treatment determinations, and therefore do not allow the evaluation of their evolution after treatment. A determination of the biomarkers both before and after administration of the biologic treatment would allow study of the kinetics of these biomarkers and correlate them with the therapeutic response.
- 8] A final limitation is the lack of a clear definition of effectiveness, which often varies according to the different studies. First, the time frame within which primary response or non-response is determined has varied between trials and clinical practice. Second, in the performed studies, response to biologic treatment has generally been determined by clinical parameters [mainly the Crohn's Disease Activity Index and the Harvey-Bradshaw Index in CD, and the Mayo score in UC<sup>83</sup>], whereas it is well known that the correlation between clinical and endoscopic response is low.<sup>192</sup> In fact, mucosal healing currently represents the true reference standard of therapeutic response, given that the resolution of endoscopic lesions has been associated with a better evolution of the disease, including longer clinical remission, lower rate of hospitalisations, and lower surgical requirements.<sup>192</sup>

## 6. Conclusions

As the number of new biologic therapies increase in IBD, identifying patients who are most likely to benefit from specific agents is of paramount importance to help best position IBD therapies. In particular, the increasing availability of biologic therapies against other specific targets and different from TNF, such as vedolizumab and ustekinumab, has expanded the therapeutic armamentarium. In this context, personalised medicine is emerging and will become a requirement in the management of patients with IBD. Therefore, there is an urgent unmet need for predicting response before treatment initiation, to reduce health care costs and avoid unnecessary treatment, allowing a more rational use of the resources.

In the present article we have reviewed the potential predictors of favourable response to biologic agents in CD and UC [Tables 1 and 2; and Supplementary Table 1, available as Supplementary data at ECCO-JCC online]. For anti-TNF agents, most of the evaluated factors have not demonstrated utility, and many others are still controversial [Table 3]. Thus, only a few factors may have a potential role in the prediction of the response to anti-TNF treatment, including disease behaviour/phenotype, disease severity, C-reactive protein, albumin, cytokine expression in serum, previous anti-TNF therapy, some proteomic markers, and some colorectal mucosa markers [Table 3]. For vedolizumab, the availability of useful predictive markers seems to be even lower, with only some factors showing a limited value, such as the expression of  $\alpha 4\beta 7$  in blood, the faecal microbiota, some proteomic markers, and some colorectal mucosa markers [Table 4]. Finally, in the case

**Table 3.** Predictive factors of response to anti-TNF agents.

| Patient-related factors                                                                                 | Predictive value                                                                                             |
|---------------------------------------------------------------------------------------------------------|--------------------------------------------------------------------------------------------------------------|
| Age                                                                                                     | Controversial                                                                                                |
| Gender                                                                                                  | None                                                                                                         |
| Weight                                                                                                  | Controversial                                                                                                |
| Smoking                                                                                                 | None                                                                                                         |
| <b>Disease-related factors</b>                                                                          |                                                                                                              |
| Disease duration                                                                                        | Controversial                                                                                                |
| Disease location/extension                                                                              | Controversial                                                                                                |
| Disease behaviour/phenotype                                                                             | Possible [inflammatory phenotype is a predictive factor of response, in contrast with stricturing phenotype] |
| Disease severity                                                                                        | Controversial in CD; possible in UC [severe UC is a predictive factor of therapeutic failure]                |
| Extraintestinal manifestations                                                                          | None                                                                                                         |
| Previous surgery                                                                                        | Controversial                                                                                                |
| <b>Biochemical markers</b>                                                                              |                                                                                                              |
| C-reactive protein                                                                                      | Possible in CD [high baseline C-reactive protein levels are predictive of response]; controversial in UC     |
| Haemoglobin                                                                                             | Controversial                                                                                                |
| LeuKocyte count                                                                                         | None                                                                                                         |
| Platelet count                                                                                          | Controversial                                                                                                |
| Albumin                                                                                                 | None in CD; possible in UC [low serum albumin levels are negatively correlated with response]                |
| Perinuclear anti-neutrophil cytoplasmic antibodies and anti- <i>Saccharomyces cerevisiae</i> antibodies | Controversial                                                                                                |
| TNF $\alpha$ levels in serum                                                                            | None                                                                                                         |
| Cytokines expression in serum                                                                           | Possible in UC [the severity of pro-inflammatory cytokine profile in serum is predictive of response]        |
| Faecal markers                                                                                          | Controversial                                                                                                |
| Genetic polymorphisms                                                                                   | Controversial                                                                                                |
| Concomitant steroids                                                                                    | Controversial in CD; none in UC                                                                              |
| Previous anti-TNF therapy                                                                               | Possible [previous anti-TNF therapy is a risk factor for treatment failure]                                  |
| Proteomics                                                                                              | Possible                                                                                                     |
| <b>Predictors at the colorectal mucosa [tissue] level</b>                                               | Possible                                                                                                     |

CD, Crohn's disease; UC, ulcerative colitis; TNF, tumour necrosis factor.

of ustekinumab, no predictive factor has been reported yet to be helpful in clinical practice [Table 5].

In summary, currently no single marker fulfils all criteria for being an appropriate prognostic indicator for response to any biologic treatment in IBD, and therefore the suggested biomarkers appear of limited clinical utility. Thus, as previously reviewed, available predictors of response to biologic therapy have shown variable and frequently conflicting results, and most of them suffer from relevant methodological limitations. Thus the basis for personalised medicine, i.e., the ability to stratify the patients according to the expected response to biologic treatment, is not yet available and remains an unmet need in daily clinical practice.

In the near future, novel markers could improve our ability to direct treatment and personalise therapy, especially if we consider that a considerable number of drugs for the treatment of IBD will soon be available. Better knowledge of predictors of response would allow correct prioritisation of both the currently available and

**Table 4.** Predictive factors of response to vedolizumab.

| Factor                                             | Predictive value                                             |
|----------------------------------------------------|--------------------------------------------------------------|
| Age                                                | None                                                         |
| Gender                                             | None                                                         |
| Smoking                                            | None                                                         |
| Disease duration                                   | None                                                         |
| Disease location/extension                         | None                                                         |
| Disease behaviour/phenotype                        | None                                                         |
| Disease severity                                   | Controversial                                                |
| Extraintestinal manifestations                     | None                                                         |
| Previous surgery                                   | None                                                         |
| C-reactive protein                                 | Controversial                                                |
| Haemoglobin                                        | None                                                         |
| Leukocyte count                                    | None                                                         |
| Expression of $\alpha 4\beta 7$ in blood           | Possible                                                     |
| Faecal calprotectin                                | None                                                         |
| Faecal microbiota                                  | Possible                                                     |
| Concomitant steroids                               | None in ulcerative colitis; controversial in Crohn's disease |
| Prior anti-TNF therapy                             | Controversial                                                |
| Proteomics                                         | Possible                                                     |
| Predictors at the colorectal mucosa [tissue] level | Possible                                                     |

TNF, tumour necrosis factor.

**Table 5.** Predictive factors of response to ustekinumab.

| Factor                      | Predictive value |
|-----------------------------|------------------|
| Age                         | None             |
| Gender                      | None             |
| Smoking                     | None             |
| Disease duration            | None             |
| Disease location/extension  | Controversial    |
| Disease behaviour/phenotype | Controversial    |
| Disease severity            | Controversial    |
| Previous surgery            | Controversial    |
| C-reactive protein          | None             |
| Faecal microbiota           | Possible         |
| Concomitant steroids        | None             |
| Previous anti-TNF therapy   | Controversial    |

TNF, tumour necrosis factor.

upcoming drugs. Furthermore, future research is needed to develop a comprehensive predictive model incorporating patient- and disease-related factors, including genetic, clinical, biochemical, proteomic, mucosal, etc., factors. Hopefully, further work in this area, along with multivariate clinical prediction modelling, may soon allow us to deliver personalised medicine by predicting individualised treatment response in patients with IBD.

## Funding

None.

## Conflict of Interest

JPG has served as a speaker, a consultant, and advisory member for or has received research funding from MSD, Abbvie, Hospira, Pfizer, Kern Pharma, Biogen, Takeda, Janssen, Roche, Sandoz, Celgene, Ferring, Faes Farma, Shire Pharmaceuticals, Dr Falk Pharma, Tillotts Pharma, Chiesi, Casen Fleet, Gebro

Pharma, Otsuka Pharmaceutical, Vifor Pharma. MC has served as a speaker, or has received research or education funding from MSD, Abbvie, Hospira, Pfizer, Takeda, Janssen, Ferring, Shire Pharmaceuticals, Dr Falk Pharma, Tillotts Pharma.

## Author Contributions

JPG wrote the first draft of the manuscript and critically reviewed the final version. MC complemented draft sections and critically reviewed the final version.

## Supplementary Data

Supplementary data are available at ECCO-JCC online.

## References

- Gomollón F, Dignass A, Annesse V, *et al.*; ECCO. Third European evidence-based consensus on the diagnosis and management of Crohn's disease 2016: Part 1: diagnosis and medical management. *J Crohns Colitis* 2017;11:3–25.
- Stidham RW, Lee TC, Higgins PD, *et al.* Systematic review with network meta-analysis: the efficacy of anti-TNF agents for the treatment of Crohn's disease. *Aliment Pharmacol Ther* 2014;39:1349–62.
- Gisbert JP, Domènech E. Vedolizumab in the treatment of Crohn's disease. *Gastroenterol Hepatol* 2015;38:338–48.
- Gisbert JP, Chaparro M. Ustekinumab to treat Crohn's disease. *Gastroenterol Hepatol* 2017;40:688–98.
- Chaudhary R, Ghosh S. Prediction of response to infliximab in Crohn's disease. *Dig Liver Dis* 2005;37:559–63.
- Bek S, Nielsen JV, Bojesen AB, *et al.* Systematic review: genetic biomarkers associated with anti-TNF treatment response in inflammatory bowel diseases. *Aliment Pharmacol Ther* 2016;44:554–67.
- Stevens TW, Matheeuwsen M, Lönnkvist MH, *et al.* Systematic review: predictive biomarkers of therapeutic response in inflammatory bowel disease personalised medicine in its infancy. *Aliment Pharmacol Ther* 2018;48:1213–31.
- Naviglio S, Giuffrida P, Stocco G, *et al.* How to predict response to anti-tumour necrosis factor agents in inflammatory bowel disease. *Expert Rev Gastroenterol Hepatol* 2018;12:797–810.
- Barré A, Colombel JF, Ungaro R. Review article: predictors of response to vedolizumab and ustekinumab in inflammatory bowel disease. *Aliment Pharmacol Ther* 2018;47:896–905.
- Flamant M, Roblin X. Inflammatory bowel disease: towards a personalised medicine. *Therap Adv Gastroenterol* 2018;11:1756283X17745029.
- Gisbert JP, Chaparro M. Clinical usefulness of proteomics in inflammatory bowel disease: a comprehensive review. *J Crohns Colitis* 2019;13:374–84.
- D'Haens GR, Panaccione R, Higgins PD, *et al.* The London position statement of the World Congress of Gastroenterology on biological therapy for IBD with the European Crohn's and Colitis Organisation: when to start, when to stop, which drug to choose, and how to predict response? *Am J Gastroenterol* 2011;106:199–212; quiz 213.
- Vermeire S, Louis E, Carbonez A, *et al.*; Belgian Group of Infliximab Expanded Access Program in Crohn's Disease. Demographic and clinical parameters influencing the short-term outcome of anti-tumour necrosis factor [infliximab] treatment in Crohn's disease. *Am J Gastroenterol* 2002;97:2357–63.
- Billiet T, Papamichael K, de Bruyn M, *et al.* A matrix-based model predicts primary response to infliximab in Crohn's disease. *J Crohns Colitis* 2015;9:1120–6.
- Sprakes MB, Ford AC, Warren L, Greer D, Hamlin J. Efficacy, tolerability, and predictors of response to infliximab therapy for Crohn's disease: a large single centre experience. *J Crohns Colitis* 2012;6:143–53.
- Fefferman DS, Lodhavia PJ, Alsahli M, *et al.* Smoking and immunomodulators do not influence the response or duration of response to infliximab in Crohn's disease. *Inflamm Bowel Dis* 2004;10:346–51.

17. Orlando A, Colombo E, Kohn A, *et al.*; Italian Multicentric Study Group on Infliximab. Infliximab in the treatment of Crohn's disease: predictors of response in an Italian multicentric open study. *Dig Liver Dis* 2005;37:577–83.
18. González-Lama Y, López-San Román A, Marín-Jiménez I, *et al.*; Group for the Study of Inflammatory Bowel Diseases from Madrid [ENICMAD]. Open-label infliximab therapy in Crohn's disease: a long-term multicenter study of efficacy, safety and predictors of response. *Gastroenterol Hepatol* 2008;31:421–6.
19. Barber GE, Yajnik V, Khalili H, *et al.* Genetic markers predict primary non-response and durable response to anti-TNF biologic therapies in Crohn's disease. *Am J Gastroenterol* 2016;111:1816–22.
20. Choi CH, Song ID, Kim YH, *et al.*; IBD Study Group of the Korean Association for the Study of the Intestinal Diseases. Efficacy and safety of infliximab therapy and predictors of response in Korean patients with Crohn's disease: a nationwide, multicenter study. *Yonsei Med J* 2016;57:1376–85.
21. Narula N, Kainz S, Petritsch W, *et al.* The efficacy and safety of either infliximab or adalimumab in 362 patients with anti-TNF- $\alpha$  naïve Crohn's disease. *Aliment Pharmacol Ther* 2016;44:170–80.
22. Fortea-Ormaechea JI, González-Lama Y, Casis B, *et al.* Adalimumab is effective in long-term real life clinical practice in both luminal and perianal Crohn's disease. The Madrid experience. *Gastroenterol Hepatol* 2011;34:443–8.
23. Miyoshi J, Hisamatsu T, Matsuoka K, *et al.* Early intervention with adalimumab may contribute to favorable clinical efficacy in patients with Crohn's disease. *Digestion* 2014;90:130–6.
24. Stein AC, Rubin DT, Hanauer SB, Cohen RD. Incidence and predictors of clinical response, re-induction dose, and maintenance dose escalation with certolizumab pegol in Crohn's disease. *Inflamm Bowel Dis* 2014;20:1722–8.
25. Sandborn WJ, Melmed GY, McGovern DP, *et al.* Clinical and demographic characteristics predictive of treatment outcomes for certolizumab pegol in moderate to severe Crohn's disease: analyses from the 7-year PRECISE 3 study. *Aliment Pharmacol Ther* 2015;42:330–42.
26. Moran GW, Dubeau MF, Kaplan GG, *et al.*; Alberta Inflammatory Bowel Disease Consortium. Phenotypic features of Crohn's disease associated with failure of medical treatment. *Clin Gastroenterol Hepatol* 2014;12:434–42.e1.
27. Ferrante M, Vermeire S, Fidler H, *et al.* Long-term outcome after infliximab for refractory ulcerative colitis. *J Crohns Colitis* 2008;2:219–25.
28. Jakobovits SL, Jewell DP, Travis SP. Infliximab for the treatment of ulcerative colitis: outcomes in Oxford from 2000 to 2006. *Aliment Pharmacol Ther* 2007;25:1055–60.
29. Arias MT, Vande Castele N, Vermeire S, *et al.* A panel to predict long-term outcome of infliximab therapy for patients with ulcerative colitis. *Clin Gastroenterol Hepatol* 2015;13:531–8.
30. Su C, Salzberg BA, Lewis JD, *et al.* Efficacy of anti-tumor necrosis factor therapy in patients with ulcerative colitis. *Am J Gastroenterol* 2002;97:2577–84.
31. Rutgeerts P, Sandborn WJ, Feagan BG, *et al.* Infliximab for induction and maintenance therapy for ulcerative colitis. *N Engl J Med* 2005;353:2462–76.
32. Gonzalez-Lama Y, Fernandez-Blanco I, Lopez-SanRoman A, *et al.*; Group for the Study of Inflammatory Bowel Diseases from Madrid. Open-label infliximab therapy in ulcerative colitis: a multicenter survey of results and predictors of response. *Hepatology* 2008;55:1609–14.
33. Oussalah A, Evesque L, Laharie D, *et al.* A multicenter experience with infliximab for ulcerative colitis: outcomes and predictors of response, optimization, colectomy, and hospitalization. *Am J Gastroenterol* 2010;105:2617–25.
34. Dahlén R, Magnusson MK, Bajor A, *et al.* Global mucosal and serum cytokine profile in patients with ulcerative colitis undergoing anti-TNF therapy. *Scand J Gastroenterol* 2015;50:1118–26.
35. Angelison L, Almer S, Eriksson A, *et al.*; Swedish Organization for the Study of Inflammatory Bowel diseases [SOIBD]. Long-term outcome of infliximab treatment in chronic active ulcerative colitis: a Swedish multicentre study of 250 patients. *Aliment Pharmacol Ther* 2017;45:519–32.
36. Beswick L, Rosella O, Rosella G, *et al.* Exploration of predictive biomarkers of early infliximab response in acute severe colitis: a prospective pilot study. *J Crohns Colitis* 2018;12:289–97.
37. Ribaldone DG, Dileo I, Pellicano R, *et al.* Severe ulcerative colitis: predictors of response and algorithm proposal for rescue therapy. *Ir J Med Sci* 2018;187:385–92.
38. García-Bosch O, Gisbert JP, Cañas-Ventura A, *et al.* Observational study on the efficacy of adalimumab for the treatment of ulcerative colitis and predictors of outcome. *J Crohns Colitis* 2013;7:717–22.
39. Gonciarz M, Mularczyk A, Szkudlanski D, Piątek I, Kopała M. [Adalimumab as induction therapy for Crohn's disease one center study]. *Pol Merkur Lekarski* 2016;41:216–20.
40. Iborra M, Pérez-Gisbert J, Bosca-Watts MM, *et al.*; Spanish Working Group on Crohn's Disease and Ulcerative Colitis [GETECCU]. Effectiveness of adalimumab for the treatment of ulcerative colitis in clinical practice: comparison between anti-tumour necrosis factor-naïve and non-naïve patients. *J Gastroenterol* 2017;52:788–99.
41. Bosca-Watts MM, Cortes X, Iborra M, *et al.* Short-term effectiveness of golimumab for ulcerative colitis: Observational multicenter study. *World J Gastroenterol* 2016;22:10432–9.
42. Taxonera C, Rodríguez C, Bertolotti F, *et al.*; Collaborators. Clinical outcomes of golimumab as first, second or third Anti-TNF agent in patients with moderate-to-severe ulcerative colitis. *Inflamm Bowel Dis* 2017;23:1394–402.
43. Nasuno M, Miyakawa M, Tanaka H, Motoya S. Short- and long-term outcomes of infliximab treatment for steroid-refractory ulcerative colitis and related prognostic factors: a single-center retrospective study. *Digestion* 2017;95:67–71.
44. Singh S, Proudfoot J, Xu R, Sandborn WJ. Obesity and response to infliximab in patients with inflammatory bowel diseases: pooled analysis of individual participant data from clinical trials. *Am J Gastroenterol* 2018;113:883–9.
45. Assa A, Hartman C, Weiss B, *et al.* Long-term outcome of tumor necrosis factor alpha antagonist's treatment in pediatric Crohn's disease. *J Crohns Colitis* 2013;7:369–76.
46. Kennedy NA, Heap GA, Green HD, *et al.*; UK Inflammatory Bowel Disease Pharmacogenetics Study Group. Predictors of anti-TNF treatment failure in anti-TNF-naïve patients with active luminal Crohn's disease: a prospective, multicentre, cohort study. *Lancet Gastroenterol Hepatol* 2019;4:341–53.
47. Reinisch W, Sandborn WJ, Hommes DW, *et al.* Adalimumab for induction of clinical remission in moderately to severely active ulcerative colitis: results of a randomised controlled trial. *Gut* 2011;60:780–7.
48. To N, Gracie DJ, Ford AC. Systematic review with meta-analysis: the adverse effects of tobacco smoking on the natural history of Crohn's disease. *Aliment Pharmacol Ther* 2016;43:549–61.
49. Parsi MA, Achkar JP, Richardson S, *et al.* Predictors of response to infliximab in patients with Crohn's disease. *Gastroenterology* 2002;123:707–13.
50. Arnott ID, McNeill G, Satsangi J. An analysis of factors influencing short-term and sustained response to infliximab treatment for Crohn's disease. *Aliment Pharmacol Ther* 2003;17:1451–7.
51. Sands BE, Anderson FH, Bernstein CN, *et al.* Infliximab maintenance therapy for fistulizing Crohn's disease. *N Engl J Med* 2004;350:876–85.
52. Zorzi F, Zuzzi S, Onali S, *et al.* Efficacy and safety of infliximab and adalimumab in Crohn's disease: a single centre study. *Aliment Pharmacol Ther* 2012;35:1397–407.
53. Kiss LS, Szamosi T, Molnar T, *et al.*; Hungarian IBD Study Group. Early clinical remission and normalisation of CRP are the strongest predictors of efficacy, mucosal healing and dose escalation during the first year of adalimumab therapy in Crohn's disease. *Aliment Pharmacol Ther* 2011;34:911–22.
54. Luna-Chadid M, Pérez Calle JL, Mendoza JL, *et al.* Predictors of response to infliximab in patients with fistulizing Crohn's disease. *Rev Esp Enferm Dig* 2004;96:379–81; 382–4.

55. Hlavaty T, Pierik M, Henckaerts L, *et al.* Polymorphisms in apoptosis genes predict response to infliximab therapy in luminal and fistulizing Crohn's disease. *Aliment Pharmacol Ther* 2005;22:613–26.
56. Laharie D, Salzmann M, Boubekour H, *et al.* Predictors of response to infliximab in luminal Crohn's disease. *Gastroenterol Clin Biol* 2005;29:145–9.
57. Narula N, Fedorak RN. Does smoking reduce infliximab's effectiveness against Crohn's disease? *Can J Gastroenterol* 2009;23:121–5.
58. Inamdar S, Volfson A, Rosen L, Sunday S, Katz S, Sultan K. Smoking and early infliximab response in Crohn's disease: a meta-analysis. *J Crohns Colitis* 2015;9:140–6.
59. Biancheri P, Powell N, Monteleone G, Lord G, MacDonald TT. The challenges of stratifying patients for trials in inflammatory bowel disease. *Trends Immunol* 2013;34:564–71.
60. Colombel JF, Reinisch W, Mantzaris GJ, *et al.* Randomised clinical trial: deep remission in biologic and immunomodulator naïve patients with Crohn's disease - a SONIC post hoc analysis. *Aliment Pharmacol Ther* 2015;41:734–46.
61. D'Haens G, Baert F, van Assche G, *et al.*; Belgian Inflammatory Bowel Disease Research Group; North-Holland Gut Club. Early combined immunosuppression or conventional management in patients with newly diagnosed Crohn's disease: an open randomised trial. *Lancet* 2008;371:660–7.
62. Hyams J, Crandall W, Kugathasan S, *et al.*; REACH Study Group. Induction and maintenance infliximab therapy for the treatment of moderate-to-severe Crohn's disease in children. *Gastroenterology* 2007;132:863–73; quiz 1165–6.
63. Lionetti P, Bronzini F, Salvestrini C, *et al.* Response to infliximab is related to disease duration in paediatric Crohn's disease. *Aliment Pharmacol Ther* 2003;18:425–31.
64. Colombel JF, Sandborn WJ, Rutgeerts P, *et al.* Adalimumab for maintenance of clinical response and remission in patients with Crohn's disease: the CHARM trial. *Gastroenterology* 2007;132:52–65.
65. Colombel JF, Sandborn WJ, Allez M, *et al.* Association between plasma concentrations of certolizumab pegol and endoscopic outcomes of patients with Crohn's disease. *Clin Gastroenterol Hepatol* 2014;12:423–31. e1.
66. Schreiber S, Khaliq-Kareemi M, Lawrance IC, *et al.*; PRECISE 2 Study Investigators. Maintenance therapy with certolizumab pegol for Crohn's disease. *N Engl J Med* 2007;357:239–50.
67. Schreiber S, Colombel JF, Bloomfield R, *et al.*; PRECISE 2 Study Investigators. Increased response and remission rates in short-duration Crohn's disease with subcutaneous certolizumab pegol: an analysis of PRECISE 2 randomized maintenance trial data. *Am J Gastroenterol* 2010;105:1574–82.
68. Sandborn WJ, Schreiber S, Feagan BG, *et al.* Certolizumab pegol for active Crohn's disease: a placebo-controlled, randomized trial. *Clin Gastroenterol Hepatol* 2011;9:670–8.e3.
69. Nichita C, Stelle M, Vavricka S, *et al.* Clinical experience with adalimumab in a multicenter Swiss cohort of patients with Crohn's disease. *Digestion* 2010;81:78–85.
70. Siegel CA, Melmed GY. Predicting response to Anti-TNF agents for the treatment of Crohn's disease. *Therap Adv Gastroenterol* 2009;2:245–51.
71. Sandborn WJ, Regula J, Feagan BG, *et al.* Delayed-release oral mesalamine 4.8 g/day [800-mg tablet] is effective for patients with moderately active ulcerative colitis. *Gastroenterology* 2009;137:1934–43.e1–3.
72. Peters CP, Eshuis EJ, Toxopeüs FM, *et al.*; North Holland GUT club. Adalimumab for Crohn's disease: long-term sustained benefit in a population-based cohort of 438 patients. *J Crohns Colitis* 2014;8:866–75.
73. Bouhnik Y, Carbonnel F, Laharie D, *et al.*; GETAID CREOLE Study Group. Efficacy of adalimumab in patients with Crohn's disease and symptomatic small bowel stricture: a multicentre, prospective, observational cohort [CREOLE] study. *Gut* 2018;67:53–60.
74. Fasanmade AA, Adedokun OJ, Blank M, Zhou H, Davis HM. Pharmacokinetic properties of infliximab in children and adults with Crohn's disease: a retrospective analysis of data from 2 phase III clinical trials. *Clin Ther* 2011;33:946–64.
75. Zampeli E, Gizis M, Siakavellas SI, Bamias G. Predictors of response to anti-tumor necrosis factor therapy in ulcerative colitis. *World J Gastrointest Pathophysiol* 2014;5:293–303.
76. Lopetuso LR, Gerardi V, Papa V, *et al.* Can we predict the efficacy of anti-TNF-alpha agents? *Int J Mol Sci* 2017;18:1973.
77. Park SH, Yang SK, Hong SM, *et al.* Severe disease activity and cytomegalovirus colitis are predictive of a nonresponse to infliximab in patients with ulcerative colitis. *Dig Dis Sci* 2013;58:3592–9.
78. Morita Y, Bamba S, Takahashi K, *et al.* Prediction of clinical and endoscopic responses to anti-tumor necrosis factor- $\alpha$  antibodies in ulcerative colitis. *Scand J Gastroenterol* 2016;51:934–41.
79. Ferrante M, Vermeire S, Katsanos KH, *et al.* Predictors of early response to infliximab in patients with ulcerative colitis. *Inflamm Bowel Dis* 2007;13:123–8.
80. Dulai PS, Singh S, Jiang X, *et al.* The real-world effectiveness and safety of vedolizumab for moderate-severe Crohn's disease: results from the US VICTORY consortium. *Am J Gastroenterol* 2016;111:1147–55.
81. Wils P, Bouhnik Y, Michetti P, *et al.*; Groupe d'Etude Thérapeutique des Affections Inflammatoires du Tube Digestif. Subcutaneous ustekinumab provides clinical benefit for two-thirds of patients with Crohn's disease refractory to anti-tumor necrosis factor agents. *Clin Gastroenterol Hepatol* 2016;14:242–50.e1–2.
82. Gisbert JP, González-Lama Y, Maté J. [Role of biological markers in inflammatory bowel disease]. *Gastroenterol Hepatol* 2007;30:117–29.
83. Ding NS, Hart A, De Cruz P. Systematic review: predicting and optimising response to anti-TNF therapy in Crohn's disease - algorithm for practical management. *Aliment Pharmacol Ther* 2016;43:30–51.
84. Louis E, Vermeire S, Rutgeerts P, *et al.* A positive response to infliximab in Crohn disease: association with a higher systemic inflammation before treatment but not with -308 TNF gene polymorphism. *Scand J Gastroenterol* 2002;37:818–24.
85. Sandborn WJ, Feagan BG, Stoinov S, *et al.*; PRECISE 1 Study Investigators. Certolizumab pegol for the treatment of Crohn's disease. *N Engl J Med* 2007;357:228–38.
86. Colombel JF, Sandborn WJ, Reinisch W, *et al.*; SONIC Study Group. Infliximab, azathioprine, or combination therapy for Crohn's disease. *N Engl J Med* 2010;362:1383–95.
87. Jürgens M, Mahachie John JM, Cleynen I, *et al.* Levels of C-reactive protein are associated with response to infliximab therapy in patients with Crohn's disease. *Clin Gastroenterol Hepatol* 2011;9:421–7.e1.
88. Reinisch W, Wang Y, Oddens BJ, Link R. C-reactive protein, an indicator for maintained response or remission to infliximab in patients with Crohn's disease: a post-hoc analysis from ACCENT I. *Aliment Pharmacol Ther* 2012;35:568–76.
89. Lee KM, Jeon YT, Cho JY, *et al.*; IBD study Group of Korean Association for the Study of Intestinal Diseases. Efficacy, safety, and predictors of response to infliximab therapy for ulcerative colitis: a Korean multicenter retrospective study. *J Gastroenterol Hepatol* 2013;28:1829–33.
90. Shelton E, Allegretti JR, Stevens B, *et al.* Efficacy of vedolizumab as induction therapy in refractory IBD patients: a multicenter cohort. *Inflamm Bowel Dis* 2015;21:2879–85.
91. Billiet T, Cleynen I, Ballet V, *et al.* Evolution of cytokines and inflammatory biomarkers during infliximab induction therapy and the impact of inflammation burden on primary response in patients with Crohn's disease. *Scand J Gastroenterol* 2017;52:1086–92.
92. Schreiber S, Rutgeerts P, Fedorak RN, *et al.*; CDP870 Crohn's Disease Study Group. A randomized, placebo-controlled trial of certolizumab pegol [CDP870] for treatment of Crohn's disease. *Gastroenterology* 2005;129:807–18.
93. Hanauer SB, Sandborn WJ, Rutgeerts P, *et al.* Human anti-tumor necrosis factor monoclonal antibody [adalimumab] in Crohn's disease: the CLASSIC-I trial. *Gastroenterology* 2006;130:323–33; quiz 591.
94. Kopylov U, Seidman E. Predicting durable response or resistance to antitumor necrosis factor therapy in inflammatory bowel disease. *Therap Adv Gastroenterol* 2016;9:513–26.

95. Shen H, Xu C, Chen C. [Platelet count predicts therapeutic response of infliximab for active Crohn's disease.] *Zhejiang Da Xue Xue Bao Yi Xue Ban* 2016;45:81–5.
96. Fasanmade AA, Adedokun OJ, Olson A, Strauss R, Davis HM. Serum albumin concentration: a predictive factor of infliximab pharmacokinetics and clinical response in patients with ulcerative colitis. *Int J Clin Pharmacol Ther* 2010;48:297–308.
97. Detrez I, Dreesen E, Van Stappen T, et al. Variability in golimumab exposure: a 'real-life' observational study in active ulcerative colitis. *J Crohns Colitis* 2016;10:575–81.
98. Gisbert JP, Gomollón F, Maté J, Pajares JM. [The role of anti-neutrophil cytoplasmic antibodies [ANCA] and anti-Saccharomyces cerevisiae antibodies [ASCA] in inflammatory bowel disease.] *Gastroenterol Hepatol* 2003;26:312–24.
99. Jürgens M, Laubender RP, Hartl F, et al. Disease activity, ANCA, and IL23R genotype status determine early response to infliximab in patients with ulcerative colitis. *Am J Gastroenterol* 2010;105:1811–9.
100. Esters N, Vermeire S, Joossens S, et al.; Belgian Group of Infliximab Expanded Access Program in Crohn's Disease. Serological markers for prediction of response to anti-tumor necrosis factor treatment in Crohn's disease. *Am J Gastroenterol* 2002;97:1458–62.
101. Nguyen DL, Nguyen ET, Bechtold ML. pANCA positivity predicts lower clinical response to infliximab therapy among patients with IBD. *South Med J* 2015;108:139–43.
102. Ho GT, Lee HM, Brydon G, et al. Fecal calprotectin predicts the clinical course of acute severe ulcerative colitis. *Am J Gastroenterol* 2009;104:673–8.
103. Beltran B, Iborra M, Saez-Gonzalez E, et al. Fecal calprotectin pre-treatment and induction infliximab levels for prediction of primary nonresponse to infliximab therapy in Crohn's disease. *Dig Dis* 2019;37:10815.
104. Hassan EA, Ramadan HK, Ismael AA, Mohamed KF, El-Attar MM, Alhelali I. Noninvasive biomarkers as surrogate predictors of clinical and endoscopic remission after infliximab induction in patients with refractory ulcerative colitis. *Saudi J Gastroenterol* 2017;23:238–45.
105. Aden K, Rehman A, Waschina S, et al. Metabolic functions of gut microbes associate with efficacy of tumor necrosis factor antagonists in patients with inflammatory bowel diseases. *Gastroenterology* 2019;157:1279–92.e11.
106. Prajapati R, Plant D, Barton A. Genetic and genomic predictors of anti-TNF response. *Pharmacogenomics* 2011;12:1571–85.
107. Ben-Horin S, Kopylov U, Chowers Y. Optimizing anti-TNF treatments in inflammatory bowel disease. *Autoimmun Rev* 2014;13:24–30.
108. Mascheretti S, Schreiber S. The role of pharmacogenomics in the prediction of efficacy of anti-TNF therapy in patients with Crohn's disease. *Pharmacogenomics* 2004;5:479–86.
109. Linares-Pineda TM, Cañadas-Garre M, Sánchez-Pozo A, Calleja-Hernández MÁ. Pharmacogenetic biomarkers of response in Crohn's disease. *Pharmacogenomics J* 2018;18:1–13.
110. Prieto-Pérez R, Almoquera B, Cabaleiro T, Hakonarson H, Abad-Santos F. Association between genetic polymorphisms and response to anti-TNFs in patients with inflammatory bowel disease. *Int J Mol Sci* 2016;17:225.
111. Taylor KD, Plevy SE, Yang H, et al. ANCA pattern and LTA haplotype relationship to clinical responses to anti-TNF antibody treatment in Crohn's disease. *Gastroenterology* 2001;120:1347–55.
112. Willot S, Vermeire S, Ohresser M, et al. No association between C-reactive protein gene polymorphisms and decrease of C-reactive protein serum concentration after infliximab treatment in Crohn's disease. *Pharmacogenet Genomics* 2006;16:37–42.
113. Matsukura H, Ikeda S, Yoshimura N, Takazoe M, Muramatsu M. Genetic polymorphisms of tumour necrosis factor receptor superfamily 1A and 1B affect responses to infliximab in Japanese patients with Crohn's disease. *Aliment Pharmacol Ther* 2008;27:765–70.
114. Steenholdt C, Enevold C, Ainsworth MA, Brynskov J, Thomsen OØ, Bendtzen K. Genetic polymorphisms of tumour necrosis factor receptor superfamily 1b and fas ligand are associated with clinical efficacy and/or acute severe infusion reactions to infliximab in Crohn's disease. *Aliment Pharmacol Ther* 2012;36:650–9.
115. Dubinsky MC, Mei L, Friedman M, et al. Genome wide association [GWA] predictors of anti-TNF alpha therapeutic responsiveness in pediatric inflammatory bowel disease. *Inflamm Bowel Dis* 2010;16:1357–66.
116. Moroi R, Endo K, Kinouchi Y, et al. FCGR3A-158 polymorphism influences the biological response to infliximab in Crohn's disease through affecting the ADCC activity. *Immunogenetics* 2013;65:265–71.
117. Thomas D, Gazouli M, Karantanos T, et al. Association of rs1568885, rs1813443 and rs4411591 polymorphisms with anti-TNF medication response in Greek patients with Crohn's disease. *World J Gastroenterol* 2014;20:3609–14.
118. Bank S, Andersen PS, Burisch J, et al. Associations between functional polymorphisms in the NFκB signaling pathway and response to anti-TNF treatment in Danish patients with inflammatory bowel disease. *Pharmacogenomics J* 2014;14:526–34.
119. Medrano LM, Taxonera C, Márquez A, et al. Role of TNFRSF1B polymorphisms in the response of Crohn's disease patients to infliximab. *Hum Immunol* 2014;75:71–5.
120. López-Hernández R, Valdés M, Campillo JA, et al. Genetic polymorphisms of tumour necrosis factor alpha [TNF-α] promoter gene and response to TNF-α inhibitors in Spanish patients with inflammatory bowel disease. *Int J Immunogenet* 2014;41:63–8.
121. Medrano LM, Taxonera C, González-Artacho C, et al. Response to infliximab in Crohn's disease: genetic analysis supporting expression profile. *Mediators Inflamm* 2015;2015:318207.
122. Koder S, Repnik K, Ferkolj I, et al. Genetic polymorphism in ATG16L1 gene influences the response to adalimumab in Crohn's disease patients. *Pharmacogenomics* 2015;16:191–204.
123. Netz U, Carter JV, Eichenberger MR, et al. Genetic polymorphisms predict response to anti-tumor necrosis factor treatment in Crohn's disease. *World J Gastroenterol* 2017;23:4958–67.
124. Burke KE, Khalili H, Garber JJ, et al. Genetic markers predict primary nonresponse and durable response to anti-tumor necrosis factor therapy in ulcerative colitis. *Inflamm Bowel Dis* 2018;24:1840–8.
125. Bank S, Andersen PS, Burisch J, et al. Genetically determined high activity of IL-12 and IL-18 in ulcerative colitis and TLR5 in Crohns disease were associated with non-response to anti-TNF therapy. *Pharmacogenomics J* 2018;18:87–97.
126. Deželak M, Repnik K, Koder S, Ferkolj I, Potočnik U. A prospective pharmacogenomic study of Crohn's disease patients during routine therapy with anti-TNF-α Drug adalimumab: contribution of ATG5, NFκB1, and CRP genes to pharmacodynamic variability. *OMICS* 2016;20:296–309.
127. Mascheretti S, Hampe J, Kühbacher T, et al. Pharmacogenetic investigation of the TNF/TNF-receptor system in patients with chronic active Crohn's disease treated with infliximab. *Pharmacogenomics J* 2002;2:127–36.
128. Vermeire S, Louis E, Rutgeerts P, et al.; Belgian Group of Infliximab Expanded Access Program and Fondation Jean Dausset CEPH, Paris, France. NOD2/CARD15 does not influence response to infliximab in Crohn's disease. *Gastroenterology* 2002;123:106–11.
129. Urcelay E, Mendoza JL, Martinez A, et al. IBD5 polymorphisms in inflammatory bowel disease: association with response to infliximab. *World J Gastroenterol* 2005;11:1187–92.
130. Louis EJ, Watier HE, Schreiber S, et al. Polymorphism in IgG Fc receptor gene FCGR3A and response to infliximab in Crohn's disease: a subanalysis of the ACCENT I study. *Pharmacogenet Genomics* 2006;16:911–4.
131. Dideberg V, Louis E, Farnir F, et al. Lymphotoxin alpha gene in Crohn's disease patients: absence of implication in the response to infliximab in a large cohort study. *Pharmacogenet Genomics* 2006;16:369–73.
132. Dideberg V, Théâtre E, Farnir F, et al. The TNF/ADAM 17 system: implication of an ADAM 17 haplotype in the clinical response to infliximab in Crohn's disease. *Pharmacogenet Genomics* 2006;16:727–34.
133. Papamichael K, Gazouli M, Karakoidas C, Panayotou I, Romagiannikou E, Mantzaris GJ. Association of TNF and FcγRIIIA gene

- polymorphisms with differential response to infliximab in a Greek cohort of Crohn's disease patients. *Ann Gastroenterol* 2011;**24**:35–40.
134. Lu C, Waugh A, Bailey RJ, *et al.* Crohn's disease genotypes of patients in remission vs relapses after infliximab discontinuation. *World J Gastroenterol* 2012;**18**:5058–64.
  135. Lacruz-Guzmán D, Torres-Moreno D, Pedrero F, *et al.* Influence of polymorphisms and TNF and IL1 $\beta$  serum concentration on the infliximab response in Crohn's disease and ulcerative colitis. *Eur J Clin Pharmacol* 2013;**69**:431–8.
  136. Urabe S, Isomoto H, Ishida T, *et al.* Genetic polymorphisms of IL-17F and TRAF3IP2 could be predictive factors of the long-term effect of infliximab against Crohn's disease. *Biomed Res Int* 2015;**2015**:416838.
  137. Barreiro-de Acosta M, Ouburg S, Morre SA, *et al.* Nod2, CD14 and TLR4 mutations do not influence response to adalimumab in patients with Crohn's disease: A preliminary report. *Rev Esp Enferm Dig* 2010;**102**:591–5.
  138. Tong Q, Zhao L, Qian XD, *et al.* Association of TNF- $\alpha$  polymorphism with prediction of response to TNF blockers in spondyloarthritis and inflammatory bowel disease: a meta-analysis. *Pharmacogenomics* 2013;**14**:1691–700.
  139. Hlavaty T, Ferrante M, Henckaerts L, Pierik M, Rutgeerts P, Vermeire S. Predictive model for the outcome of infliximab therapy in Crohn's disease based on apoptotic pharmacogenetic index and clinical predictors. *Inflamm Bowel Dis* 2007;**13**:372–9.
  140. Louis E, El Ghoul Z, Vermeire S, *et al.* Association between polymorphism in IgG Fc receptor IIIa coding gene and biological response to infliximab in Crohn's disease. *Aliment Pharmacol Ther* 2004;**19**:511–9.
  141. Gonczi L, Vegh Z, Golovics PA, *et al.* Prediction of short- and medium-term efficacy of biosimilar infliximab therapy: do trough levels and antidrug antibody levels or clinical and biochemical markers play the more important role? *J Crohns Colitis* 2017;**11**:697–705.
  142. Gisbert JP, Marín AC, McNicholl AG, Chaparro M. Systematic review with meta-analysis: the efficacy of a second anti-TNF in patients with inflammatory bowel disease whose previous anti-TNF treatment has failed. *Aliment Pharmacol Ther* 2015;**41**:613–23.
  143. Ma C, Panaccione R, Heitman SJ, Devlin SM, Ghosh S, Kaplan GG. Systematic review: the short-term and long-term efficacy of adalimumab following discontinuation of infliximab. *Aliment Pharmacol Ther* 2009;**30**:977–86.
  144. Da W, Zhu J, Wang L, Lu Y. Adalimumab for Crohn's disease after infliximab treatment failure: a systematic review. *Eur J Gastroenterol Hepatol* 2013;**25**:885–91.
  145. Martínez-Borra J, López-Larrea C, González S, *et al.* High serum tumor necrosis factor-alpha levels are associated with lack of response to infliximab in fistulizing Crohn's disease. *Am J Gastroenterol* 2002;**97**:2350–6.
  146. Amini Kadijani A, Asadzadeh Aghdaei H, Sorrentino D, *et al.* Transmembrane TNF- $\alpha$  density, but not soluble TNF- $\alpha$  level, is associated with primary response to infliximab in inflammatory bowel disease. *Clin Transl Gastroenterol* 2017;**8**:e117.
  147. Baird AC, Mallon D, Radford-Smith G, *et al.* Dysregulation of innate immunity in ulcerative colitis patients who fail anti-tumor necrosis factor therapy. *World J Gastroenterol* 2016;**22**:9104–16.
  148. West NR, Hegazy AN, Owens BMJ, *et al.*; Oxford IBD Cohort Investigators. Oncostatin M drives intestinal inflammation and predicts response to tumor necrosis factor-neutralizing therapy in patients with inflammatory bowel disease. *Nat Med* 2017;**23**:579–89.
  149. Obratsov IV, Shirokikh KE, Obratsova OI, Shapina MV, Wang MH, Khalif IL. Multiple cytokine profiling: a new model to predict response to tumor necrosis factor antagonists in ulcerative colitis patients. *Inflamm Bowel Dis* 2019;**25**:524–31.
  150. Meuwis MA, Fillet M, Lutterli L, *et al.* Proteomics for prediction and characterization of response to infliximab in Crohn's disease: a pilot study. *Clin Biochem* 2008;**41**:960–7.
  151. Gazouli M, Anagnostopoulos AK, Papadopoulou A, *et al.* Serum protein profile of Crohn's disease treated with infliximab. *J Crohns Colitis* 2013;**7**:e461–70.
  152. Eftekhari P, Glaubitz L, Breidert M, Neurath MF, Atreya R. Physiological intermolecular modification spectroscopy for the prediction of response to anti-tumor necrosis factor therapy in patients with inflammatory bowel diseases. *Dig Dis* 2014;**32**:446–54.
  153. Haberman Y, Tickle TL, Dexheimer PJ, *et al.* Pediatric Crohn disease patients exhibit specific ileal transcriptome and microbiome signature. *J Clin Invest* 2014;**124**:3617–33.
  154. Yilmaz B, Juillerat P, Øyås O, *et al.*; Swiss IBD Cohort Investigators. Microbial network disturbances in relapsing refractory Crohn's disease. *Nat Med* 2019;**25**:323–36.
  155. Gerich ME, McGovern DP. Towards personalized care in IBD. *Nat Rev Gastroenterol Hepatol* 2014;**11**:287–99.
  156. Arijs I, Li K, Toedter G, *et al.* Mucosal gene signatures to predict response to infliximab in patients with ulcerative colitis. *Gut* 2009;**58**:1612–9.
  157. Arijs I, Quintens R, Van Lommel L, *et al.* Predictive value of epithelial gene expression profiles for response to infliximab in Crohn's disease. *Inflamm Bowel Dis* 2010;**16**:2090–8.
  158. Verstockt B, Verstockt S, Dehairs J, *et al.* Low TREM1 expression in whole blood predicts anti-TNF response in inflammatory bowel disease. *EBioMedicine* 2019;**40**:733–42.
  159. Ferkolj I, Ihan A, Markovic S. CD19+ in intestinal mucosa predict the response to infliximab in Crohn's disease. *Hepatogastroenterology* 2005;**52**:1128–33.
  160. Olsen T, Goll R, Cui G, Christiansen I, Florholmen J. TNF-alpha gene expression in colorectal mucosa as a predictor of remission after induction therapy with infliximab in ulcerative colitis. *Cytokine* 2009;**46**:222–7.
  161. Atreya R, Neumann H, Neufert C, *et al.* In vivo imaging using fluorescent antibodies to tumor necrosis factor predicts therapeutic response in Crohn's disease. *Nat Med* 2014;**20**:313–8.
  162. Vatansever A, Çekiç C, Ekinci N, *et al.* Effects of mucosal TNF-alpha levels on treatment response in Crohn's disease patients receiving anti-TNF treatment. *Hepatogastroenterology* 2014;**61**:2277–82.
  163. Rismo R, Olsen T, Cui G, Christiansen I, Florholmen J, Goll R. Mucosal cytokine gene expression profiles as biomarkers of response to infliximab in ulcerative colitis. *Scand J Gastroenterol* 2012;**47**:538–47.
  164. Halloran B, Chang J, Shih DQ, *et al.* Molecular patterns in human ulcerative colitis and correlation with response to infliximab. *Inflamm Bowel Dis* 2014;**20**:2353–63.
  165. Zhang X, Hu J, Suo L, Yang Z, Xu T, Zhang Y. [IL-17 and IL23 expression as a predictor of response to infliximab treatment in Crohn's disease]. *Zhonghua Nei Ke Za Zhi* 2015;**54**:940–4.
  166. Viazis N, Giakoumis M, Bamias G, *et al.* Predictors of tissue healing in ulcerative colitis patients treated with anti-TNF. *Dig Liver Dis* 2017;**49**:29–33.
  167. Telesco SE, Brodmerkel C, Zhang H, *et al.* Gene expression signature for prediction of golimumab response in a phase 2a open-label trial of patients with ulcerative colitis. *Gastroenterology* 2018;**155**:1008–11.e8.
  168. Gaujoux R, Starosvetsky E, Maimon N, *et al.*; Israeli IBD Research Network [IIRN]. Cell-centred meta-analysis reveals baseline predictors of anti-TNF $\alpha$  non-response in biopsy and blood of patients with IBD. *Gut* 2019;**68**:604–14.
  169. Amiot A, Grimaud JC, Peyrin-Biroulet L, *et al.*; Observatory on Efficacy of Vedolizumab in Patients With Inflammatory Bowel Disease Study Group; Groupe d'Etude Therapeutique des Affections Inflammatoires du tube Digestif. Effectiveness and safety of vedolizumab induction therapy for patients with inflammatory bowel disease. *Clin Gastroenterol Hepatol* 2016;**14**:1593–601.e2.
  170. Baumgart DC, Bokemeyer B, Drabik A, Stallmach A, Schreiber S; Vedolizumab Germany Consortium. Vedolizumab induction therapy for inflammatory bowel disease in clinical practice – a nationwide consecutive German cohort study. *Aliment Pharmacol Ther* 2016;**43**:1090–102.
  171. Singh N, Rabizadeh S, Jossen J, *et al.* Multi-center experience of vedolizumab effectiveness in pediatric inflammatory bowel disease. *Inflamm Bowel Dis* 2016;**22**:2121–6.
  172. Kopylov U, Ron Y, Avni-Biron I, *et al.* Efficacy and safety of vedolizumab for induction of remission in inflammatory bowel disease the Israeli real-world experience. *Inflamm Bowel Dis* 2017;**23**:404–8.

173. Lenti MV, Levison S, Eliadou E, *et al.* A real-world, long-term experience on effectiveness and safety of vedolizumab in adult patients with inflammatory bowel disease: The Cross Pennine study. *Dig Liver Dis* 2018;50:1299–304.
174. Chaparro M, Garre A, Ricart E, *et al.*; GETECCU study group. Short- and long-term effectiveness and safety of vedolizumab in inflammatory bowel disease: results from the ENEIDA registry. *Aliment Pharmacol Ther* 2018;48:839–51.
175. Sandborn WJ, Feagan BG, Rutgeerts P, *et al.*; GEMINI 2 Study Group. Vedolizumab as induction and maintenance therapy for Crohn's disease. *N Engl J Med* 2013;369:711–21.
176. Stallmach A, Langbein C, Atreya R, *et al.* Vedolizumab provides clinical benefit over 1 year in patients with active inflammatory bowel disease a prospective multicenter observational study. *Aliment Pharmacol Ther* 2016;44:1199–212.
177. Feagan BG, Rutgeerts P, Sands BE, *et al.*; GEMINI 1 Study Group. Vedolizumab as induction and maintenance therapy for ulcerative colitis. *N Engl J Med* 2013;369:699–710.
178. Ananthakrishnan AN, Luo C, Yajnik V, *et al.* Gut microbiome function predicts response to anti-integrin biologic therapy in inflammatory bowel diseases. *Cell Host Microbe* 2017;21:603–10.e3.
179. Boden EK, Shows DM, Chiorean MV, Lord JD. Identification of candidate biomarkers associated with response to vedolizumab in inflammatory bowel disease. *Dig Dis Sci* 2018;63:2419–29.
180. Soendergaard C, Seidelin JB, Steenholdt C, Nielsen OH. Putative biomarkers of vedolizumab resistance and underlying inflammatory pathways involved in IBD. *BMJ Open Gastroenterol* 2018;5:e000208.
181. Rath T, Bojarski C, Neurath MF, Atreya R. Molecular imaging of mucosal  $\alpha 4\beta 7$  integrin expression with the fluorescent anti-adhesion antibody vedolizumab in Crohn's disease. *Gastrointest Endosc* 2017;86:406–8.
182. Vermeire S, O'Byrne S, Keir M, *et al.* Etrolizumab as induction therapy for ulcerative colitis: a randomised, controlled, phase 2 trial. *Lancet* 2014;384:309–18.
183. Tew GW, Hackney JA, Gibbons D, *et al.* Association between response to etrolizumab and expression of integrin  $\alpha e$  and granzyme a in colon biopsies of patients with ulcerative colitis. *Gastroenterology* 2016;150:477–87.e9.
184. Feagan BG, Sandborn WJ, Gasink C, *et al.*; UNITI-IM-UNITI Study Group. Ustekinumab as induction and maintenance therapy for Crohn's disease. *N Engl J Med* 2016;375:1946–60.
185. Harris KA, Horst S, Gadani A, *et al.* Patients with refractory Crohn's disease successfully treated with ustekinumab. *Inflamm Bowel Dis* 2016;22:397–401.
186. Khorrami S, Ginard D, Marín-Jiménez I, *et al.* Ustekinumab for the treatment of refractory Crohn's disease: The Spanish experience in a large multicentre open-label cohort. *Inflamm Bowel Dis* 2016;22:1662–9.
187. Kopylov U, Afif W, Cohen A, *et al.* Subcutaneous ustekinumab for the treatment of anti-TNF resistant Crohn's disease—the McGill experience. *J Crohns Colitis* 2014;8:1516–22.
188. Greenup AJ, Rosenfeld G, Bressler B. Ustekinumab use in Crohn's disease: a Canadian tertiary care centre experience. *Scand J Gastroenterol* 2017;52:1354–9.
189. Sandborn WJ, Feagan BG, Fedorak RN, *et al.*; Ustekinumab Crohn's Disease Study Group. A randomized trial of ustekinumab, a human interleukin-12/23 monoclonal antibody, in patients with moderate-to-severe Crohn's disease. *Gastroenterology* 2008;135:1130–41.
190. Dotan I, Ron Y, Yanai H, *et al.* Patient factors that increase infliximab clearance and shorten half-life in inflammatory bowel disease: a population pharmacokinetic study. *Inflamm Bowel Dis* 2014;20:2247–59.
191. Brown P, Clark T, Dowson G, *et al.* Relationship of body mass index to clinical outcomes after infliximab therapy in patients with Crohn's disease. *J Crohns Colitis* 2016;10:1144–50.
192. Peyrin-Biroulet L, Sandborn W, Sands BE, *et al.* Selecting Therapeutic Targets in Inflammatory Bowel Disease [STRIDE]: determining therapeutic goals for treat-to-target. *Am J Gastroenterol* 2015;110:1324–38.
193. Magro F, Rodrigues-Pinto E, Santos-Antunes J, *et al.* High C-reactive protein in Crohn's disease patients predicts nonresponse to infliximab treatment. *J Crohns Colitis* 2014;8:129–36.
194. Reich KM, Fedorak RN, Madsen K, Kroeker KI. Role of vitamin D in infliximab-induced remission in adult patients with Crohn's disease. *Inflamm Bowel Dis* 2016;22:92–9.
195. Di Sabatino A, Biancheri P, Piconese S, *et al.* Peripheral regulatory T cells and serum transforming growth factor- $\beta$ : relationship with clinical response to infliximab in Crohn's disease. *Inflamm Bowel Dis* 2010;16:1891–7.
196. Present DH, Rutgeerts P, Targan S, *et al.* Infliximab for the treatment of fistulas in patients with Crohn's disease. *N Engl J Med* 1999;340:1398–405.
197. Caneparo V, Pastorelli L, Pisani LF, *et al.* Distinct anti-IFI16 and anti-GP2 antibodies in inflammatory bowel disease and their variation with infliximab therapy. *Inflamm Bowel Dis* 2016;22:2977–87.
198. Magnusson MK, Strid H, Isaksson S, *et al.* Cultured blood T-cell responses predict anti-TNF therapy response in patients with ulcerative colitis. *Aliment Pharmacol Ther* 2015;41:1149–61.
199. Magnusson MK, Strid H, Sapnara M, *et al.* Anti-TNF therapy response in patients with ulcerative colitis is associated with colonic antimicrobial peptide expression and microbiota composition. *J Crohns Colitis* 2016;10:943–52.
200. Yarur AJ, Jain A, Sussman DA, *et al.* The association of tissue anti-TNF drug levels with serological and endoscopic disease activity in inflammatory bowel disease: the ATLAS study. *Gut* 2016;65:249–55.
201. Groselj D, Grabec I, Seme K, Ihan A, Ferkolj I. Prediction of clinical response to anti-TNF treatment by oral parameters in Crohn's disease. *Hepatogastroenterology* 2008;55:112–9.
202. Mascheretti S, Hampe J, Croucher PJ, *et al.* Response to infliximab treatment in Crohn's disease is not associated with mutations in the CARD15 [NOD2] gene: an analysis in 534 patients from two multicenter, prospective GCP-level trials. *Pharmacogenetics* 2002;12:509–15.
203. Pierik M, Vermeire S, Steen KV, *et al.* Tumour necrosis factor- $\alpha$  receptor 1 and 2 polymorphisms in inflammatory bowel disease and their association with response to infliximab. *Aliment Pharmacol Ther* 2004;20:303–10.
204. Tougeron D, Savoye G, Savoye-Collet C, Koning E, Michot F, Lerebours E. Predicting factors of fistula healing and clinical remission after infliximab-based combined therapy for perianal fistulizing Crohn's disease. *Dig Dis Sci* 2009;54:1746–52.
205. Yamada M, Sakurai T, Komeda Y, *et al.* Clinical significance of BMI1 expression in inflammatory bowel disease. *Oncology* 2017;93[Suppl 1]:20–6.
